# Supplementary material for: Key auxin response factor (ARF) genes constraining wheat tillering of mutant dmc
Source: PeerJ. 2021 Sep 21;9:e12221. doi: 10.7717/peerj.12221 (PMC8462377; doi:10.7717/peerj.12221)
Supplement: Supplemental Information 2 [file peerj-09-12221-s002.xls]

## Sheet: Sheet1
Table S2 The basic information of ARFs in wheat
Gene name	Gene ID	Physical position	Amino acid length / aa	Theoretical pI	Molecular weight / Da
TaARF1-3A	TraesCS3A02G159200.1	3A: 158467595-158471848	759	6.07	83727.4
TaARF1-3B	TraesCS3B02G190100.1	3B: 202574346-202578692	758	6.15	83510.2
TaARF1-3D	TraesCS3D02G166700.1	3D: 140766103-140770322	758	6.07	83574.3
TaARF2-3A	TraesCS3A02G246000.1	3A: 461786114-461792083	666	6.76	73516.8
TaARF2-3B	TraesCS3B02G273400.2	3B: 440405289-440411269	706	6.26	77854.6
TaARF2-3D	TraesCS3D02G245400.2	3D: 341503293-341512542	747	6.8	82047.3
TaARF3-3A	TraesCS3A02G292400.1	3A: 522271068-522277462	653	8.31	70308.7
TaARF3-3B	TraesCS3B02G327000.1	3B: 527654119-527661465	660	8.46	71267.8
TaARF3-3D	TraesCS3D02G292100.1	3D: 401893668-401899417	693	8.7	74303.2
TaARF4-3A-1	TraesCS3A02G442000.1	3A: 684040773-684045606	797	6.05	89229.9
TaARF4-3A-2	TraesCS3A02G449300.3	3A: 688689321-688693672	829	5.9	92487.5
TaARF4-3B-1	TraesCS3B02G475800.1	3B: 724737433-724742425	796	6.05	89098.7
TaARF4-3B-2	TraesCS3B02G486000.2	3B: 732614629-732619521	826	5.9	92317.5
TaARF4-3D-1	TraesCS3D02G434700.1	3D: 547298032-547302973	796	6.05	89043.6
TaARF4-3D-2	TraesCS3D02G442000.7	3D: 551998358-552003298	886	6.36	98816.3
TaARF5-6A	TraesCS6A02G113000.1	6A: 83250992-83258917	1135	5.93	126076
TaARF5-6B	TraesCS6B02G141300.2	6B: 140597261-140605112	1131	5.93	125706
TaARF5-6D	TraesCS6D02G102300.1	6D: 65497984-65505801	1129	5.93	125319
TaARF6-6A	TraesCS6A02G138600.4	6A: 109983416-109988274	928	5.63	102389
TaARF6-6B	TraesCS6B02G167100.1	6B: 175337535-175345009	927	5.62	102436
TaARF6-6D	TraesCS6D02G127600.2	6D: 91516586-91522540	927	5.61	102497
TaARF8-2D	TraesCS2D02G376600.1	2D: 480775965-480778720	714	6.25	76416
TaARF8-6A	TraesCS6A02G222300.1	6A: 415905558-415907673	672	7.62	72907.1
TaARF8-6B	TraesCS6B02G258800.1	6B: 466695618-466698313	747	8.65	80658.9
TaARF8-6D	TraesCS6D02G212700.1	6D: 301268010-301270782	769	8.65	83017.6
TaARF9-2A	TraesCS2A02G309300.1	2A: 532491310-532496731	654	5.84	72518.7
TaARF9-2B	TraesCS2B02G326400.1	2B: 466189430-466195033	654	5.77	72581.7
TaARF9-2D	TraesCS2D02G307600.1	2D: 394536026-394541495	654	5.7	72521.7
TaARF10-2B	TraesCS2B02G397300.1	2B: 563921112-563924301	708	6.37	76213.7
TaARF11-2A	TraesCS2A02G491000.1	2A: 724296566-724302700	955	5.74	105517
TaARF11-2B	TraesCS2B02G519200.2	2B: 714127089-714133648	955	5.81	105353
TaARF11-2D	TraesCS2D02G491200.2	2D: 589972466-589978865	955	5.83	105367
TaARF12-2A	TraesCS2A02G547800.1	2A: 755768802-755776624	831	5.97	92548.4
TaARF12-2B	TraesCS2B02G578500.1	2B: 766557473-766568984	833	5.88	92703.6
TaARF12-2D	TraesCS2D02G548900.1	2D: 624361690-624369366	833	5.88	92632.5
TaARF13-2A	TraesCS2A02G567300.1	2A: 766151730-766156639	515	5.68	55849.1
TaARF13-2D	TraesCS2D02G577800.1	2D: 640997628-641003955	513	5.42	55343.5
TaARF13-7A-1	TraesCS7A02G475600.1	7A: 670578996-670580194	374	6.56	40693.2
TaARF13-7A-2	TraesCS7A02G475700.1	7A: 670732714-670734217	371	6.56	40377.8
TaARF13-7D	TraesCS7D02G463000.1	7D: 578177553-578179101	354	7.19	38829.7
TaARF14-1A	TraesCS1A02G334900.1	1A: 522229516-522235237	707	6.71	75723.6
TaARF14-1B	TraesCS1B02G347900.2	1B: 577606740-577612236	698	6.71	74766.6
TaARF14-1D	TraesCS1D02G337400.1	1D: 427148433-427153780	698	6.46	75056.9
TaARF15-1A	TraesCS1A02G396400.1	1A: 562316367-562321517	735	7.38	80391
TaARF15-1B	TraesCS1B02G424700.1	1B: 649049858-649055625	742	6.97	81014.7
TaARF15-1D	TraesCS1D02G404400.1	1D: 469215517-469220694	735	7.16	80358
TaARF16-7A	TraesCS7A02G160800.1	7A: 116871592-116878338	1066	5.95	118562
TaARF16-7B	TraesCS7B02G065800.2	7B: 71361927-71368111	1081	6.31	120589
TaARF16-7D	TraesCS7D02G161900.1	7D: 112045748-112052551	1065	6	118374
TaARF17-7A	TraesCS7A02G461700.1	7A: 657715805-657722562	909	5.88	100313
TaARF17-7B	TraesCS7B02G363100.1	7B: 625296433-625302193	909	5.93	100158
TaARF17-7D	TraesCS7D02G449900.2	7D: 568949472-568954531	908	5.96	100169
TaARF18-7A	TraesCS7A02G446900.1	7A: 641577992-641581799	701	8.15	75792
TaARF18-7B	TraesCS7B02G346700.1	7B: 602937797-602941577	694	7.91	75181.4
TaARF18-7D	TraesCS7D02G436800.1	7D: 556120190-556124226	695	8.13	75250.6
TaARF19-7A	TraesCS7A02G416400.1	7A: 608398282-608407279	1173	6.11	130604
TaARF19-7B	TraesCS7B02G316600.1	7B: 565908841-565917820	1174	6.22	130822
TaARF19-7D	TraesCS7D02G409700.1	7D: 528133883-528142887	1175	6.16	130932
TaARF21-7A	TraesCS7A02G252000.2	7A: 236611658-236620693	1087	6.07	120572
TaARF21-7B	TraesCS7B02G138900.6	7B: 174568114-174575122	1094	6.06	121388
TaARF21-7D	TraesCS7D02G250100.4	7D: 222138468-222145370	1092	6.02	121206
TaARF22-1A	TraesCS1A02G156600.1	1A: 278141903-278145724	688	7.59	74442
TaARF22-1B	TraesCS1B02G173700.1	1B: 310926364-310931299	691	7.6	74729.3
TaARF22-1D	TraesCS1D02G155100.1	1D: 217142447-217147277	688	7.59	74323.8
TaARF25-5A	TraesCS5A02G038300.2	5A: 35626865-35633118	899	5.81	99210.1
TaARF25-5B	TraesCS5B02G039800.1	5B: 44776428-44782874	891	5.77	98340.9
TaARF25-5D	TraesCS5D02G045700.2	5D: 44907236-44913663	900	5.74	99238
