# Supplementary material for: Key auxin response factor (ARF) genes constraining wheat tillering of mutant dmc
Source: PeerJ. 2021 Sep 21;9:e12221. doi: 10.7717/peerj.12221 (PMC8462377; doi:10.7717/peerj.12221)
Supplement: Supplemental Information 3 [file peerj-09-12221-s003.xls]

## Sheet: Sheet1
Table S3 Conserved motif analysis of wheat ARF proteins.
Motif	Width	E value	Best possible match
motif 1	50	6.1e-2782	ELIAKDLHGNEWKFRHIYRGQPKRHLLTTGWSVFVNKKKLVAGDSVIFIR
motif 2	41	3.7e-2113	HYFCKTLTASDTSTHGGFSVPRRCAEKCFPPLDYTMQPPCQ
motif 3	36	1.7e-1544	LWHACAGPLVCLPRVGSRVYYFPQGHSEQVAASMNK
motif 4	34	2.0e-1289	AHAAATNSMFTIFYNPRASPSEFIIPYWKYMKAM
motif 5	41	3.4e-1271	WKLVYVDHENDIMLVGDDPWEEFCNCVRCIKIYTPEEVQKM
motif 6	41	7.0e-1457	VRWPNSHWRCLKVRWDESTACERPNRVSPWEIEPVTTMPMI
motif 7	41	6.6e-1367	LPPKLICRVHNVTMHADAETDEVYAQMTLQPENEYEKKDMY
motif 8	50	6.0e-871	RMRTFTKVYKRGAVGRSIDITRYSNYHELRHELARMFGIEGQLEDPYRIG
motif 9	21	6.2e-851	GMRFKMMFETEESSERRYMGT
motif 10	29	1.2e-822	GELRLGIRRANRQQTNMPSSVLSSDSMHI
