# Supplementary material for: Key auxin response factor (ARF) genes constraining wheat tillering of mutant dmc
Source: PeerJ. 2021 Sep 21;9:e12221. doi: 10.7717/peerj.12221 (PMC8462377; doi:10.7717/peerj.12221)
Supplement: Supplemental Information 4 [file peerj-09-12221-s004.xls]

## Sheet: wheat_vs_other species
Table S4 One-to-one orthologous relationships of ARFs between wheat and and other species
TaARF gene id	TaARF gene name	Chromosome	ARF gene id	ARF gene name	Chromosome	Ka	Ks	Ka/Ks	Selection pressure
TraesCS1A02G156600.1	TaARF22-1A	1A	AT2G28350.1	AtARF10	2	0.543397	0.845633	0.642592	Purifying selection
TraesCS1B02G173700.1	TaARF22-1B	1B	AT2G28350.1	AtARF10	2	0.558031	0.85237	0.654682	Purifying selection
TraesCS1D02G155100.1	TaARF22-1D	1D	AT2G28350.1	AtARF10	2	0.555956	0.845124	0.65784	Purifying selection
TraesCS7A02G160800.1	TaARF16-7A	7A	AT5G20730.1	AtARF7	5	0.531114	0.882369	0.601918	Purifying selection
TraesCS7B02G065800.2	TaARF16-7B	7B	AT5G20730.1	AtARF7	5	0.544912	0.823654	0.661579	Purifying selection
TraesCS7D02G161900.1	TaARF16-7D	7D	AT5G20730.1	AtARF7	5	0.534501	0.847896	0.630385	Purifying selection
TraesCS3A02G159200.1	TaARF1-3A	3A	Os01t0236300-01	OsARF1	1	0.145732	0.573507	0.254107	Purifying selection
TraesCS3B02G190100.1	TaARF1-3B	3B	Os01t0236300-01	OsARF1	1	0.143787	0.589809	0.243786	Purifying selection
TraesCS3D02G166700.1	TaARF1-3D	3D	Os01t0236300-01	OsARF1	1	0.143432	0.582647	0.246173	Purifying selection
TraesCS1A02G396400.1	TaARF15-1A	1A	Os01t0670800-02	OsARF2	1	0.223247	0.828939	0.269316	Purifying selection
TraesCS1B02G424700.1	TaARF15-1B	1B	Os01t0670800-02	OsARF2	1	0.224844	0.790357	0.284484	Purifying selection
TraesCS1D02G404400.1	TaARF15-1D	1D	Os01t0670800-02	OsARF2	1	0.220158	0.863174	0.255056	Purifying selection
TraesCS3A02G246000.1	TaARF2-3A	3A	Os01t0670800-02	OsARF2	1	0.1315	0.373516	0.352061	Purifying selection
TraesCS3B02G273400.2	TaARF2-3B	3B	Os01t0670800-02	OsARF2	1	0.13156	0.405525	0.324418	Purifying selection
TraesCS3D02G245400.2	TaARF2-3D	3D	Os01t0670800-02	OsARF2	1	0.126626	0.372566	0.339876	Purifying selection
TraesCS1A02G334900.1	TaARF14-1A	1A	Os01t0753500-01	OsARF3	1	0.294535	0.913311	0.322491	Purifying selection
TraesCS1B02G347900.2	TaARF14-1B	1B	Os01t0753500-01	OsARF3	1	0.298362	0.836671	0.356606	Purifying selection
TraesCS1D02G337400.1	TaARF14-1D	1D	Os01t0753500-01	OsARF3	1	0.310286	0.895533	0.346482	Purifying selection
TraesCS3A02G292400.1	TaARF3-3A	3A	Os01t0753500-01	OsARF3	1	0.141234	0.568743	0.248326	Purifying selection
TraesCS3B02G327000.1	TaARF3-3B	3B	Os01t0753500-01	OsARF3	1	0.165424	0.586107	0.282242	Purifying selection
TraesCS3D02G292100.1	TaARF3-3D	3D	Os01t0753500-01	OsARF3	1	0.15851	0.567813	0.279159	Purifying selection
TraesCS3A02G442000.1	TaARF4-3A-1	3A	Os01t0927600-01	OsARF4	1	0.0837216	0.622249	0.134547	Purifying selection
TraesCS3B02G475800.1	TaARF4-3B-1	3B	Os01t0927600-01	OsARF4	1	0.0834071	0.594979	0.140185	Purifying selection
TraesCS3D02G434700.1	TaARF4-3D-1	3D	Os01t0927600-01	OsARF4	1	0.0833292	0.554327	0.150325	Purifying selection
TraesCS6B02G141300.2	TaARF5-6B	6B	Os02t0141100-00	OsARF5	2	0.104213	0.627561	0.16606	Purifying selection
TraesCS6D02G102300.1	TaARF5-6D	6D	Os02t0141100-00	OsARF5	2	0.104638	0.611568	0.171098	Purifying selection
TraesCS7A02G416400.1	TaARF19-7A	7A	Os02t0141100-00	OsARF5	2	0.153253	1.03555	0.147992	Purifying selection
TraesCS7B02G316600.1	TaARF19-7B	7B	Os02t0141100-00	OsARF5	2	0.153104	1.00307	0.152634	Purifying selection
TraesCS7D02G409700.1	TaARF19-7D	7D	Os02t0141100-00	OsARF5	2	0.152819	1.01805	0.150109	Purifying selection
TraesCS6A02G138600.4	TaARF6-6A	6A	Os02t0164900-01	OsARF6	2	0.0785747	0.556148	0.141284	Purifying selection
TraesCS6B02G167100.1	TaARF6-6B	6B	Os02t0164900-01	OsARF6	2	0.0774403	0.532319	0.145477	Purifying selection
TraesCS6D02G127600.2	TaARF6-6D	6D	Os02t0164900-01	OsARF6	2	0.0779791	0.545049	0.143068	Purifying selection
TraesCS7A02G461700.1	TaARF17-7A	7A	Os02t0164900-01	OsARF6	2	0.0994025	0.982243	0.101199	Purifying selection
TraesCS7B02G363100.1	TaARF17-7B	7B	Os02t0164900-01	OsARF6	2	0.100546	0.980374	0.102559	Purifying selection
TraesCS7D02G449900.2	TaARF17-7D	7D	Os02t0164900-01	OsARF6	2	0.0996978	0.95528	0.104365	Purifying selection
TraesCS2A02G309300.1	TaARF9-2A	2A	Os02t0557200-01	OsARF7	2	0.145863	0.885976	0.164636	Purifying selection
TraesCS2B02G326400.1	TaARF9-2B	2B	Os02t0557200-01	OsARF7	2	0.141985	0.904732	0.156936	Purifying selection
TraesCS2D02G307600.1	TaARF9-2D	2D	Os02t0557200-01	OsARF7	2	0.144038	0.929575	0.154951	Purifying selection
TraesCS1A02G156600.1	TaARF22-1A	1A	Os02t0628600-01	OsARF8	2	0.316713	1.46562	0.216095	Purifying selection
TraesCS1B02G173700.1	TaARF22-1B	1B	Os02t0628600-01	OsARF8	2	0.318651	1.3908	0.229113	Purifying selection
TraesCS1D02G155100.1	TaARF22-1D	1D	Os02t0628600-01	OsARF8	2	0.314712	1.52904	0.205824	Purifying selection
TraesCS2B02G397300.1	TaARF10-2B	2B	Os02t0628600-01	OsARF8	2	0.182455	0.51554	0.353911	Purifying selection
TraesCS2D02G376600.1	TaARF8-2D	2D	Os02t0628600-01	OsARF8	2	0.185783	0.499372	0.372033	Purifying selection
TraesCS6A02G222300.1	TaARF8-6A	6A	Os02t0628600-01	OsARF8	2	0.0994939	0.379487	0.26218	Purifying selection
TraesCS6B02G258800.1	TaARF8-6B	6B	Os02t0628600-01	OsARF8	2	0.0958938	0.401771	0.238678	Purifying selection
TraesCS6D02G212700.1	TaARF8-6D	6D	Os02t0628600-01	OsARF8	2	0.0981276	0.372147	0.26368	Purifying selection
TraesCS2A02G309300.1	TaARF9-2A	2A	Os04t0442000-01	OsARF9	4	0.103654	0.523095	0.198155	Purifying selection
TraesCS2B02G326400.1	TaARF9-2B	2B	Os04t0442000-01	OsARF9	4	0.100588	0.531773	0.189155	Purifying selection
TraesCS2D02G307600.1	TaARF9-2D	2D	Os04t0442000-01	OsARF9	4	0.102769	0.527948	0.194657	Purifying selection
TraesCS1B02G173700.1	TaARF22-1B	1B	Os04t0519700-01	OsARF10	4	0.311031	0.921159	0.337652	Purifying selection
TraesCS1D02G155100.1	TaARF22-1D	1D	Os04t0519700-01	OsARF10	4	0.30731	0.94342	0.325741	Purifying selection
TraesCS2B02G397300.1	TaARF10-2B	2B	Os04t0519700-01	OsARF10	4	0.183135	0.437348	0.418741	Purifying selection
TraesCS2D02G376600.1	TaARF8-2D	2D	Os04t0519700-01	OsARF10	4	0.192716	0.432892	0.445183	Purifying selection
TraesCS6A02G222300.1	TaARF8-6A	6A	Os04t0519700-01	OsARF10	4	0.23737	0.524449	0.452609	Purifying selection
TraesCS6B02G258800.1	TaARF8-6B	6B	Os04t0519700-01	OsARF10	4	0.22466	0.628443	0.357487	Purifying selection
TraesCS6D02G212700.1	TaARF8-6D	6D	Os04t0519700-01	OsARF10	4	0.240685	0.524008	0.459315	Purifying selection
TraesCS2A02G491000.1	TaARF11-2A	2A	Os04t0664400-02	OsARF11	4	0.105861	0.724623	0.146091	Purifying selection
TraesCS2B02G519200.2	TaARF11-2B	2B	Os04t0664400-02	OsARF11	4	0.102227	0.730491	0.139943	Purifying selection
TraesCS2D02G491200.2	TaARF11-2D	2D	Os04t0664400-02	OsARF11	4	0.10221	0.768446	0.133009	Purifying selection
TraesCS2B02G578500.1	TaARF12-2B	2B	Os04t0671900-01	OsARF12	4	0.0405247	0.528531	0.0766742	Purifying selection
TraesCS2D02G548900.1	TaARF12-2D	2D	Os04t0671900-01	OsARF12	4	0.0413654	0.552035	0.0749326	Purifying selection
TraesCS2A02G567300.1	TaARF13-2A	2A	Os04t0690600-01	OsARF13	4	0.331249	0.649743	0.509815	Purifying selection
TraesCS2D02G577800.1	TaARF13-2D	2D	Os04t0690600-01	OsARF13	4	0.326226	0.619191	0.526858	Purifying selection
TraesCS1A02G334900.1	TaARF14-1A	1A	Os05t0515400-01	OsARF14	5	0.214082	0.743336	0.288002	Purifying selection
TraesCS1B02G347900.2	TaARF14-1B	1B	Os05t0515400-01	OsARF14	5	0.226247	0.794689	0.284699	Purifying selection
TraesCS1D02G337400.1	TaARF14-1D	1D	Os05t0515400-01	OsARF14	5	0.225303	0.774431	0.290927	Purifying selection
TraesCS3A02G292400.1	TaARF3-3A	3A	Os05t0515400-01	OsARF14	5	0.295148	1.02948	0.286696	Purifying selection
TraesCS3B02G327000.1	TaARF3-3B	3B	Os05t0515400-01	OsARF14	5	0.287747	0.977449	0.294385	Purifying selection
TraesCS3D02G292100.1	TaARF3-3D	3D	Os05t0515400-01	OsARF14	5	0.276383	0.971613	0.284458	Purifying selection
TraesCS1A02G396400.1	TaARF15-1A	1A	Os05t0563400-01	OsARF15	5	0.129299	0.574319	0.225135	Purifying selection
TraesCS1B02G424700.1	TaARF15-1B	1B	Os05t0563400-01	OsARF15	5	0.128488	0.560061	0.229418	Purifying selection
TraesCS1D02G404400.1	TaARF15-1D	1D	Os05t0563400-01	OsARF15	5	0.12493	0.581355	0.214895	Purifying selection
TraesCS3A02G246000.1	TaARF2-3A	3A	Os05t0563400-01	OsARF15	5	0.215943	0.667805	0.323362	Purifying selection
TraesCS3B02G273400.2	TaARF2-3B	3B	Os05t0563400-01	OsARF15	5	0.208653	0.662544	0.314927	Purifying selection
TraesCS3D02G245400.2	TaARF2-3D	3D	Os05t0563400-01	OsARF15	5	0.202497	0.64672	0.313114	Purifying selection
TraesCS7A02G160800.1	TaARF16-7A	7A	Os06t0196700-02	OsARF16	6	0.0621451	0.592642	0.104861	Purifying selection
TraesCS7B02G065800.2	TaARF16-7B	7B	Os06t0196700-02	OsARF16	6	0.0666899	0.586492	0.11371	Purifying selection
TraesCS7D02G161900.1	TaARF16-7D	7D	Os06t0196700-02	OsARF16	6	0.05977	0.587298	0.101771	Purifying selection
TraesCS6A02G138600.4	TaARF6-6A	6A	Os06t0677800-01	OsARF17	6	0.0953442	0.891462	0.106953	Purifying selection
TraesCS6B02G167100.1	TaARF6-6B	6B	Os06t0677800-01	OsARF17	6	0.0947426	0.864428	0.109602	Purifying selection
TraesCS6D02G127600.2	TaARF6-6D	6D	Os06t0677800-01	OsARF17	6	0.0942021	0.864428	0.108976	Purifying selection
TraesCS7A02G461700.1	TaARF17-7A	7A	Os06t0677800-01	OsARF17	6	0.0542291	0.608813	0.0890736	Purifying selection
TraesCS7B02G363100.1	TaARF17-7B	7B	Os06t0677800-01	OsARF17	6	0.0534641	0.62043	0.0861727	Purifying selection
TraesCS7D02G449900.2	TaARF17-7D	7D	Os06t0677800-01	OsARF17	6	0.0546724	0.612461	0.0892668	Purifying selection
TraesCS7A02G446900.1	TaARF18-7A	7A	Os06t0685700-01	OsARF18	6	0.0735922	0.512428	0.143615	Purifying selection
TraesCS7B02G346700.1	TaARF18-7B	7B	Os06t0685700-01	OsARF18	6	0.0758422	0.513046	0.147827	Purifying selection
TraesCS7D02G436800.1	TaARF18-7D	7D	Os06t0685700-01	OsARF18	6	0.074406	0.529846	0.140429	Purifying selection
TraesCS6B02G141300.2	TaARF5-6B	6B	Os06t0702600-01	OsARF19	6	0.129704	1.03538	0.125271	Purifying selection
TraesCS7A02G416400.1	TaARF19-7A	7A	Os06t0702600-01	OsARF19	6	0.068412	0.692417	0.0988017	Purifying selection
TraesCS7B02G316600.1	TaARF19-7B	7B	Os06t0702600-01	OsARF19	6	0.071005	0.669222	0.106101	Purifying selection
TraesCS7D02G409700.1	TaARF19-7D	7D	Os06t0702600-01	OsARF19	6	0.0660624	0.69709	0.094769	Purifying selection
TraesCS7A02G252000.2	TaARF21-7A	7A	Os08t0520550-01	OsARF21	8	0.0653288	0.62569	0.104411	Purifying selection
TraesCS7B02G138900.6	TaARF21-7B	7B	Os08t0520550-01	OsARF21	8	0.0558747	0.612459	0.0912301	Purifying selection
TraesCS7D02G250100.4	TaARF21-7D	7D	Os08t0520550-01	OsARF21	8	0.0623587	0.614254	0.10152	Purifying selection
TraesCS1A02G156600.1	TaARF22-1A	1A	Os10t0479900-01	OsARF22	10	0.0816055	0.487047	0.167552	Purifying selection
TraesCS1B02G173700.1	TaARF22-1B	1B	Os10t0479900-01	OsARF22	10	0.0858481	0.479067	0.179199	Purifying selection
TraesCS1D02G155100.1	TaARF22-1D	1D	Os10t0479900-01	OsARF22	10	0.0841029	0.50096	0.167884	Purifying selection
TraesCS2B02G397300.1	TaARF10-2B	2B	Os10t0479900-01	OsARF22	10	0.337889	1.33162	0.253742	Purifying selection
TraesCS2D02G376600.1	TaARF8-2D	2D	Os10t0479900-01	OsARF22	10	0.336108	1.34884	0.249183	Purifying selection
TraesCS6A02G222300.1	TaARF8-6A	6A	Os10t0479900-01	OsARF22	10	0.310693	1.32171	0.235068	Purifying selection
TraesCS6B02G258800.1	TaARF8-6B	6B	Os10t0479900-01	OsARF22	10	0.311523	1.40103	0.222354	Purifying selection
TraesCS5A02G038300.2	TaARF25-5A	5A	Os12t0613700-01	OsARF25	12	0.115089	0.575618	0.199939	Purifying selection
TraesCS5B02G039800.1	TaARF25-5B	5B	Os12t0613700-01	OsARF25	12	0.115645	0.593689	0.194791	Purifying selection
TraesCS5D02G045700.2	TaARF25-5D	5D	Os12t0613700-01	OsARF25	12	0.118527	0.561751	0.210995	Purifying selection
TraesCS2B02G578500.1	TaARF12-2B	2B	Zm00001d001879_T014	ZmARF3	2	0.0482971	0.565573	0.085395	Purifying selection
TraesCS2D02G548900.1	TaARF12-2D	2D	Zm00001d001879_T014	ZmARF3	2	0.0477336	0.588317	0.0811359	Purifying selection
TraesCS2A02G491000.1	TaARF11-2A	2A	Zm00001d001945_T002	ZmARF4	2	0.144307	0.802633	0.179792	Purifying selection
TraesCS2B02G519200.2	TaARF11-2B	2B	Zm00001d001945_T002	ZmARF4	2	0.137455	0.870287	0.157942	Purifying selection
TraesCS2D02G491200.2	TaARF11-2D	2D	Zm00001d001945_T002	ZmARF4	2	0.14371	0.84787	0.169495	Purifying selection
TraesCS2A02G567300.1	TaARF13-2A	2A	Zm00001d002929_T001	ZmARF5	2	0.315752	0.508784	0.620601	Purifying selection
TraesCS2D02G577800.1	TaARF13-2D	2D	Zm00001d002929_T001	ZmARF5	2	0.310237	0.520318	0.596245	Purifying selection
TraesCS2A02G309300.1	TaARF9-2A	2A	Zm00001d003601_T006	ZmARF6	2	0.142578	0.655556	0.217492	Purifying selection
TraesCS2B02G326400.1	TaARF9-2B	2B	Zm00001d003601_T006	ZmARF6	2	0.140029	0.693315	0.201971	Purifying selection
TraesCS2D02G307600.1	TaARF9-2D	2D	Zm00001d003601_T006	ZmARF6	2	0.144306	0.692556	0.208368	Purifying selection
TraesCS3A02G442000.1	TaARF4-3A-1	3A	Zm00001d011953_T001	ZmARF25	8	0.122694	0.771512	0.159031	Purifying selection
TraesCS3B02G475800.1	TaARF4-3B-1	3B	Zm00001d011953_T001	ZmARF25	8	0.122004	0.772777	0.157877	Purifying selection
TraesCS3D02G434700.1	TaARF4-3D-1	3D	Zm00001d011953_T001	ZmARF25	8	0.119943	0.766759	0.156429	Purifying selection
TraesCS1A02G334900.1	TaARF14-1A	1A	Zm00001d012731_T010	ZmARF3	8	0.328323	1.18584	0.27687	Purifying selection
TraesCS1B02G347900.2	TaARF14-1B	1B	Zm00001d012731_T010	ZmARF3	8	0.328186	1.08775	0.301712	Purifying selection
TraesCS1D02G337400.1	TaARF14-1D	1D	Zm00001d012731_T010	ZmARF3	8	0.345195	1.20894	0.285536	Purifying selection
TraesCS3A02G292400.1	TaARF3-3A	3A	Zm00001d012731_T010	ZmARF3	8	0.198952	0.622456	0.319624	Purifying selection
TraesCS3B02G327000.1	TaARF3-3B	3B	Zm00001d012731_T010	ZmARF3	8	0.208197	0.635245	0.327743	Purifying selection
TraesCS3D02G292100.1	TaARF3-3D	3D	Zm00001d012731_T010	ZmARF3	8	0.190026	0.621586	0.305711	Purifying selection
TraesCS1A02G156600.1	TaARF22-1A	1A	Zm00001d014013_T002	ZmARF17	5	0.0932584	0.608466	0.153268	Purifying selection
TraesCS1B02G173700.1	TaARF22-1B	1B	Zm00001d014013_T002	ZmARF17	5	0.0957749	0.618432	0.154867	Purifying selection
TraesCS1D02G155100.1	TaARF22-1D	1D	Zm00001d014013_T002	ZmARF17	5	0.0936392	0.640671	0.146158	Purifying selection
TraesCS7A02G461700.1	TaARF17-7A	7A	Zm00001d014377_T002	ZmARF18	5	0.0699095	0.664428	0.105218	Purifying selection
TraesCS7B02G363100.1	TaARF17-7B	7B	Zm00001d014377_T002	ZmARF18	5	0.0688662	0.655939	0.104989	Purifying selection
TraesCS7D02G449900.2	TaARF17-7D	7D	Zm00001d014377_T002	ZmARF18	5	0.0708979	0.664503	0.106693	Purifying selection
TraesCS7A02G446900.1	TaARF18-7A	7A	Zm00001d014507_T001	ZmARF16	5	0.105831	0.555539	0.190501	Purifying selection
TraesCS7B02G346700.1	TaARF18-7B	7B	Zm00001d014507_T001	ZmARF16	5	0.117937	0.570329	0.206788	Purifying selection
TraesCS7D02G436800.1	TaARF18-7D	7D	Zm00001d014507_T001	ZmARF16	5	0.0999851	0.556665	0.179614	Purifying selection
TraesCS6B02G141300.2	TaARF5-6B	6B	Zm00001d014690_T014	ZmARF7	5	0.15971	1.07012	0.149244	Purifying selection
TraesCS7A02G416400.1	TaARF19-7A	7A	Zm00001d014690_T014	ZmARF7	5	0.102766	0.738542	0.139147	Purifying selection
TraesCS7B02G316600.1	TaARF19-7B	7B	Zm00001d014690_T014	ZmARF7	5	0.103163	0.736291	0.140112	Purifying selection
TraesCS7D02G409700.1	TaARF19-7D	7D	Zm00001d014690_T014	ZmARF7	5	0.099387	0.761722	0.130477	Purifying selection
TraesCS6B02G141300.2	TaARF5-6B	6B	Zm00001d015243_T001	ZmARF20	5	0.112224	0.754165	0.148805	Purifying selection
TraesCS7A02G416400.1	TaARF19-7A	7A	Zm00001d015243_T001	ZmARF20	5	0.170004	1.22372	0.138923	Purifying selection
TraesCS7B02G316600.1	TaARF19-7B	7B	Zm00001d015243_T001	ZmARF20	5	0.168463	1.16738	0.144309	Purifying selection
TraesCS7D02G409700.1	TaARF19-7D	7D	Zm00001d015243_T001	ZmARF20	5	0.171881	1.18002	0.14566	Purifying selection
TraesCS2A02G309300.1	TaARF9-2A	2A	Zm00001d016838_T001	ZmARF1	5	0.162299	1.12433	0.144352	Purifying selection
TraesCS2B02G326400.1	TaARF9-2B	2B	Zm00001d016838_T001	ZmARF1	5	0.160265	1.10757	0.144699	Purifying selection
TraesCS2D02G307600.1	TaARF9-2D	2D	Zm00001d016838_T001	ZmARF1	5	0.163155	1.15312	0.14149	Purifying selection
TraesCS2B02G397300.1	TaARF10-2B	2B	Zm00001d017284_T001	ZmARF8	5	0.18563	0.634622	0.292506	Purifying selection
TraesCS2D02G376600.1	TaARF8-2D	2D	Zm00001d017284_T001	ZmARF8	5	0.188313	0.620706	0.303385	Purifying selection
TraesCS6A02G222300.1	TaARF8-6A	6A	Zm00001d017284_T001	ZmARF8	5	0.132383	0.534546	0.247654	Purifying selection
TraesCS6B02G258800.1	TaARF8-6B	6B	Zm00001d017284_T001	ZmARF8	5	0.129465	0.536623	0.241259	Purifying selection
TraesCS6D02G212700.1	TaARF8-6D	6D	Zm00001d017284_T001	ZmARF8	5	0.133955	0.506767	0.264332	Purifying selection
TraesCS2A02G491000.1	TaARF11-2A	2A	Zm00001d026540_T001	ZmARF5	10	0.12265	0.750213	0.163487	Purifying selection
TraesCS2B02G519200.2	TaARF11-2B	2B	Zm00001d026540_T001	ZmARF5	10	0.123407	0.790595	0.156093	Purifying selection
TraesCS2D02G491200.2	TaARF11-2D	2D	Zm00001d026540_T001	ZmARF5	10	0.120528	0.827415	0.145668	Purifying selection
TraesCS2A02G567300.1	TaARF13-2A	2A	Zm00001d026687_T001	ZmARF31	10	0.413725	0.55547	0.744819	Purifying selection
TraesCS2D02G577800.1	TaARF13-2D	2D	Zm00001d026687_T001	ZmARF31	10	0.423712	0.525231	0.806715	Purifying selection
TraesCS5A02G038300.2	TaARF25-5A	5A	Zm00001d031064_T002	ZmARF34	1	0.114362	0.592447	0.193034	Purifying selection
TraesCS5B02G039800.1	TaARF25-5B	5B	Zm00001d031064_T002	ZmARF34	1	0.115529	0.582395	0.198369	Purifying selection
TraesCS5D02G045700.2	TaARF25-5D	5D	Zm00001d031064_T002	ZmARF34	1	0.114655	0.563057	0.203629	Purifying selection
TraesCS7A02G252000.2	TaARF21-7A	7A	Zm00001d031522_T007	ZmARF1	1	0.113859	0.563042	0.202222	Purifying selection
TraesCS7B02G138900.6	TaARF21-7B	7B	Zm00001d031522_T007	ZmARF1	1	0.1159	0.561979	0.206236	Purifying selection
TraesCS7D02G250100.4	TaARF21-7D	7D	Zm00001d031522_T007	ZmARF1	1	0.115161	0.558401	0.206234	Purifying selection
TraesCS1A02G156600.1	TaARF22-1A	1A	Zm00001d032683_T001	ZmARF2	1	0.0955671	0.703318	0.13588	Purifying selection
TraesCS1B02G173700.1	TaARF22-1B	1B	Zm00001d032683_T001	ZmARF2	1	0.0978641	0.699059	0.139994	Purifying selection
TraesCS1D02G155100.1	TaARF22-1D	1D	Zm00001d032683_T001	ZmARF2	1	0.0955505	0.709106	0.134748	Purifying selection
TraesCS6A02G138600.4	TaARF6-6A	6A	Zm00001d036593_T001	ZmARF6	6	0.11701	0.933984	0.125281	Purifying selection
TraesCS6B02G167100.1	TaARF6-6B	6B	Zm00001d036593_T001	ZmARF6	6	0.111061	0.899001	0.123538	Purifying selection
TraesCS6D02G127600.2	TaARF6-6D	6D	Zm00001d036593_T001	ZmARF6	6	0.113795	0.906462	0.125537	Purifying selection
TraesCS7A02G461700.1	TaARF17-7A	7A	Zm00001d036593_T001	ZmARF6	6	0.0785918	0.651403	0.12065	Purifying selection
TraesCS7B02G363100.1	TaARF17-7B	7B	Zm00001d036593_T001	ZmARF6	6	0.0759917	0.62306	0.121965	Purifying selection
TraesCS7D02G449900.2	TaARF17-7D	7D	Zm00001d036593_T001	ZmARF6	6	0.077779	0.647791	0.120068	Purifying selection
TraesCS1A02G334900.1	TaARF14-1A	1A	Zm00001d038698_T001	ZmARF3	6	0.234587	0.812911	0.288576	Purifying selection
TraesCS1B02G347900.2	TaARF14-1B	1B	Zm00001d038698_T001	ZmARF3	6	0.244833	0.833844	0.293619	Purifying selection
TraesCS1D02G337400.1	TaARF14-1D	1D	Zm00001d038698_T001	ZmARF3	6	0.253857	0.87249	0.290957	Purifying selection
TraesCS3A02G292400.1	TaARF3-3A	3A	Zm00001d038698_T001	ZmARF3	6	0.265899	0.839271	0.316821	Purifying selection
TraesCS3B02G327000.1	TaARF3-3B	3B	Zm00001d038698_T001	ZmARF3	6	0.278124	0.88874	0.312942	Purifying selection
TraesCS3D02G292100.1	TaARF3-3D	3D	Zm00001d038698_T001	ZmARF3	6	0.266827	0.844682	0.31589	Purifying selection
TraesCS1A02G396400.1	TaARF15-1A	1A	Zm00001d039006_T007	ZmARF3	6	0.161814	0.600567	0.269435	Purifying selection
TraesCS1B02G424700.1	TaARF15-1B	1B	Zm00001d039006_T007	ZmARF3	6	0.153107	0.567603	0.269743	Purifying selection
TraesCS1D02G404400.1	TaARF15-1D	1D	Zm00001d039006_T007	ZmARF3	6	0.153657	0.616304	0.249321	Purifying selection
TraesCS3A02G246000.1	TaARF2-3A	3A	Zm00001d039006_T007	ZmARF3	6	0.269344	0.807298	0.333636	Purifying selection
TraesCS3B02G273400.2	TaARF2-3B	3B	Zm00001d039006_T007	ZmARF3	6	0.253763	0.804399	0.315468	Purifying selection
TraesCS3D02G245400.2	TaARF2-3D	3D	Zm00001d039006_T007	ZmARF3	6	0.27632	0.822779	0.335837	Purifying selection
TraesCS3A02G159200.1	TaARF1-3A	3A	Zm00001d039267_T001	ZmARF7	3	0.217546	0.833547	0.260988	Purifying selection
TraesCS3B02G190100.1	TaARF1-3B	3B	Zm00001d039267_T001	ZmARF7	3	0.216194	0.838131	0.257948	Purifying selection
TraesCS3D02G166700.1	TaARF1-3D	3D	Zm00001d039267_T001	ZmARF7	3	0.218377	0.821317	0.265886	Purifying selection
TraesCS3A02G442000.1	TaARF4-3A-1	3A	Zm00001d042267_T003	ZmARF10	3	0.129008	0.687512	0.187644	Purifying selection
TraesCS3B02G475800.1	TaARF4-3B-1	3B	Zm00001d042267_T003	ZmARF10	3	0.12843	0.687434	0.186825	Purifying selection
TraesCS3D02G434700.1	TaARF4-3D-1	3D	Zm00001d042267_T003	ZmARF10	3	0.127723	0.667929	0.191222	Purifying selection
TraesCS1A02G334900.1	TaARF14-1A	1A	Zm00001d043431_T012	ZmARF11	3	0.333789	1.19001	0.280492	Purifying selection
TraesCS1B02G347900.2	TaARF14-1B	1B	Zm00001d043431_T012	ZmARF11	3	0.314907	1.13033	0.278597	Purifying selection
TraesCS1D02G337400.1	TaARF14-1D	1D	Zm00001d043431_T012	ZmARF11	3	0.349684	1.22543	0.285355	Purifying selection
TraesCS3A02G292400.1	TaARF3-3A	3A	Zm00001d043431_T012	ZmARF11	3	0.191928	0.667346	0.287599	Purifying selection
TraesCS3B02G327000.1	TaARF3-3B	3B	Zm00001d043431_T012	ZmARF11	3	0.202585	0.698467	0.290043	Purifying selection
TraesCS3D02G292100.1	TaARF3-3D	3D	Zm00001d043431_T012	ZmARF11	3	0.191462	0.674076	0.284036	Purifying selection
TraesCS1A02G396400.1	TaARF15-1A	1A	Zm00001d043922_T001	ZmARF12	3	0.225311	0.705573	0.31933	Purifying selection
TraesCS1B02G424700.1	TaARF15-1B	1B	Zm00001d043922_T001	ZmARF12	3	0.216097	0.701176	0.308192	Purifying selection
TraesCS1D02G404400.1	TaARF15-1D	1D	Zm00001d043922_T001	ZmARF12	3	0.215434	0.743075	0.289922	Purifying selection
TraesCS3A02G246000.1	TaARF2-3A	3A	Zm00001d043922_T001	ZmARF12	3	0.199092	0.488318	0.40771	Purifying selection
TraesCS3B02G273400.2	TaARF2-3B	3B	Zm00001d043922_T001	ZmARF12	3	0.196348	0.474707	0.413619	Purifying selection
TraesCS3D02G245400.2	TaARF2-3D	3D	Zm00001d043922_T001	ZmARF12	3	0.193371	0.450342	0.429387	Purifying selection
TraesCS7A02G160800.1	TaARF16-7A	7A	Zm00001d045026_T002	ZmARF7	9	0.0794872	0.690901	0.115049	Purifying selection
TraesCS7B02G065800.2	TaARF16-7B	7B	Zm00001d045026_T002	ZmARF7	9	0.082293	0.66665	0.123443	Purifying selection
TraesCS7D02G161900.1	TaARF16-7D	7D	Zm00001d045026_T002	ZmARF7	9	0.0761522	0.67781	0.11235	Purifying selection
TraesCS2B02G397300.1	TaARF10-2B	2B	Zm00001d051172_T001	ZmARF15	4	0.198645	0.580557	0.342164	Purifying selection
TraesCS2D02G376600.1	TaARF8-2D	2D	Zm00001d051172_T001	ZmARF15	4	0.196818	0.574274	0.342725	Purifying selection
TraesCS6A02G222300.1	TaARF8-6A	6A	Zm00001d051172_T001	ZmARF15	4	0.146134	0.520314	0.280857	Purifying selection
TraesCS6B02G258800.1	TaARF8-6B	6B	Zm00001d051172_T001	ZmARF15	4	0.138217	0.514415	0.268687	Purifying selection
TraesCS6D02G212700.1	TaARF8-6D	6D	Zm00001d051172_T001	ZmARF15	4	0.144854	0.498347	0.290669	Purifying selection
TraesCS6A02G138600.4	TaARF6-6A	6A	Zm00001d053819_T002	ZmARF6	4	0.0990987	0.747651	0.132547	Purifying selection
TraesCS6B02G167100.1	TaARF6-6B	6B	Zm00001d053819_T002	ZmARF6	4	0.1001	0.717784	0.139457	Purifying selection
TraesCS6D02G127600.2	TaARF6-6D	6D	Zm00001d053819_T002	ZmARF6	4	0.100654	0.701326	0.14352	Purifying selection
