# Supplementary material for: Key auxin response factor (ARF) genes constraining wheat tillering of mutant dmc
Source: PeerJ. 2021 Sep 21;9:e12221. doi: 10.7717/peerj.12221 (PMC8462377; doi:10.7717/peerj.12221)
Supplement: Supplemental Information 5 [file peerj-09-12221-s005.xls]

## Sheet: Sheet1
Table S5 The duplication gene pairs of ARFs in wheat genome
Gene_id	Gene_name	Chromosome	Gene_id	Gene_name	Chromosome	duplication type
TraesCS1A02G334900.1	TaARF14-1A	1A	TraesCS1B02G347900.2	TaARF14-1B	1B	segmental duplication
TraesCS1A02G396400.1	TaARF15-1A	1A	TraesCS1B02G424700.1	TaARF15-1B	1B	segmental duplication
TraesCS1A02G156600.1	TaARF22-1A	1A	TraesCS1B02G173700.1	TaARF22-1B	1B	segmental duplication
TraesCS1A02G396400.1	TaARF15-1A	1A	TraesCS1D02G404400.1	TaARF15-1D	1D	segmental duplication
TraesCS1A02G334900.1	TaARF14-1A	1A	TraesCS1D02G337400.1	TaARF14-1D	1D	segmental duplication
TraesCS1A02G156600.1	TaARF22-1A	1A	TraesCS1D02G155100.1	TaARF22-1D	1D	segmental duplication
TraesCS1A02G396400.1	TaARF15-1A	1A	TraesCS3A02G246000.1	TaARF2-3A	3A	segmental duplication
TraesCS1A02G396400.1	TaARF15-1A	1A	TraesCS3B02G273400.2	TaARF2-3B	3B	segmental duplication
TraesCS1A02G334900.1	TaARF14-1A	1A	TraesCS3D02G292100.1	TaARF3-3D	3D	segmental duplication
TraesCS1B02G347900.2	TaARF14-1B	1B	TraesCS1D02G337400.1	TaARF14-1D	1D	segmental duplication
TraesCS1B02G424700.1	TaARF15-1B	1B	TraesCS1D02G404400.1	TaARF15-1D	1D	segmental duplication
TraesCS1B02G173700.1	TaARF22-1B	1B	TraesCS1D02G155100.1	TaARF22-1D	1D	segmental duplication
TraesCS1B02G347900.2	TaARF14-1B	1B	TraesCS3A02G292400.1	TaARF3-3A	3A	segmental duplication
TraesCS1B02G424700.1	TaARF15-1B	1B	TraesCS3B02G273400.2	TaARF2-3B	3B	segmental duplication
TraesCS1B02G347900.2	TaARF14-1B	1B	TraesCS3B02G327000.1	TaARF3-3B	3B	segmental duplication
TraesCS1B02G424700.1	TaARF15-1B	1B	TraesCS3D02G245400.2	TaARF2-3D	3D	segmental duplication
TraesCS1B02G347900.2	TaARF14-1B	1B	TraesCS3D02G292100.1	TaARF3-3D	3D	segmental duplication
TraesCS1D02G404400.1	TaARF15-1D	1D	TraesCS3A02G246000.1	TaARF2-3A	3A	segmental duplication
TraesCS1D02G337400.1	TaARF14-1D	1D	TraesCS3A02G292400.1	TaARF3-3A	3A	segmental duplication
TraesCS1D02G337400.1	TaARF14-1D	1D	TraesCS3B02G327000.1	TaARF3-3B	3B	segmental duplication
TraesCS1D02G404400.1	TaARF15-1D	1D	TraesCS3B02G273400.2	TaARF2-3B	3B	segmental duplication
TraesCS1D02G404400.1	TaARF15-1D	1D	TraesCS3D02G245400.2	TaARF2-3D	3D	segmental duplication
TraesCS2A02G491000.1	TaARF11-2A	2A	TraesCS2B02G519200.2	TaARF11-2B	2B	segmental duplication
TraesCS2A02G547800.1	TaARF12-2A	2A	TraesCS2B02G578500.1	TaARF12-2B	2B	segmental duplication
TraesCS2A02G309300.1	TaARF9-2A	2A	TraesCS2B02G326400.1	TaARF9-2B	2B	segmental duplication
TraesCS2A02G491000.1	TaARF11-2A	2A	TraesCS2D02G491200.2	TaARF11-2D	2D	segmental duplication
TraesCS2A02G547800.1	TaARF12-2A	2A	TraesCS2D02G548900.1	TaARF12-2D	2D	segmental duplication
TraesCS2A02G309300.1	TaARF9-2A	2A	TraesCS2D02G307600.1	TaARF9-2D	2D	segmental duplication
TraesCS2A02G567300.1	TaARF13-2A	2A	TraesCS2D02G577800.1	TaARF13-2D	2D	segmental duplication
TraesCS2B02G326400.1	TaARF9-2B	2B	TraesCS2D02G307600.1	TaARF9-2D	2D	segmental duplication
TraesCS2B02G397300.1	TaARF10-2B	2B	TraesCS2D02G376600.1	TaARF8-2D	2D	segmental duplication
TraesCS2B02G519200.2	TaARF11-2B	2B	TraesCS2D02G491200.2	TaARF11-2D	2D	segmental duplication
TraesCS2B02G578500.1	TaARF12-2B	2B	TraesCS2D02G548900.1	TaARF12-2D	2D	segmental duplication
TraesCS2B02G397300.1	TaARF10-2B	2B	TraesCS6A02G222300.1	TaARF8-6A	6A	segmental duplication
TraesCS2B02G397300.1	TaARF10-2B	2B	TraesCS6B02G258800.1	TaARF8-6B	6B	segmental duplication
TraesCS2B02G397300.1	TaARF10-2B	2B	TraesCS6D02G212700.1	TaARF8-6D	6D	segmental duplication
TraesCS2D02G376600.1	TaARF8-2D	2D	TraesCS6A02G222300.1	TaARF8-6A	6A	segmental duplication
TraesCS2D02G376600.1	TaARF8-2D	2D	TraesCS6B02G258800.1	TaARF8-6B	6B	segmental duplication
TraesCS2D02G376600.1	TaARF8-2D	2D	TraesCS6D02G212700.1	TaARF8-6D	6D	segmental duplication
TraesCS3A02G442000.1	TaARF4-3A-1	3A	TraesCS3B02G475800.1	TaARF4-3B-1	3B	segmental duplication
TraesCS3A02G449300.3	TaARF4-3A-2	3A	TraesCS3B02G486000.2	TaARF4-3B-2	3B	segmental duplication
TraesCS3A02G292400.1	TaARF3-3A	3A	TraesCS3B02G327000.1	TaARF3-3B	3B	segmental duplication
TraesCS3A02G159200.1	TaARF1-3A	3A	TraesCS3B02G190100.1	TaARF1-3B	3B	segmental duplication
TraesCS3A02G246000.1	TaARF2-3A	3A	TraesCS3B02G273400.2	TaARF2-3B	3B	segmental duplication
TraesCS3A02G442000.1	TaARF4-3A-1	3A	TraesCS3D02G434700.1	TaARF4-3D-1	3D	segmental duplication
TraesCS3A02G449300.3	TaARF4-3A-2	3A	TraesCS3D02G442000.7	TaARF4-3D-2	3D	segmental duplication
TraesCS3A02G292400.1	TaARF3-3A	3A	TraesCS3D02G292100.1	TaARF3-3D	3D	segmental duplication
TraesCS3A02G159200.1	TaARF1-3A	3A	TraesCS3D02G166700.1	TaARF1-3D	3D	segmental duplication
TraesCS3A02G246000.1	TaARF2-3A	3A	TraesCS3D02G245400.2	TaARF2-3D	3D	segmental duplication
TraesCS3B02G273400.2	TaARF2-3B	3B	TraesCS3D02G245400.2	TaARF2-3D	3D	segmental duplication
TraesCS3B02G327000.1	TaARF3-3B	3B	TraesCS3D02G292100.1	TaARF3-3D	3D	segmental duplication
TraesCS3B02G475800.1	TaARF4-3B-1	3B	TraesCS3D02G434700.1	TaARF4-3D-1	3D	segmental duplication
TraesCS3B02G486000.2	TaARF4-3B-2	3B	TraesCS3D02G442000.7	TaARF4-3D-2	3D	segmental duplication
TraesCS3B02G190100.1	TaARF1-3B	3B	TraesCS3D02G166700.1	TaARF1-3D	3D	segmental duplication
TraesCS5A02G038300.2	TaARF25-5A	5A	TraesCS5B02G039800.1	TaARF25-5B	5B	segmental duplication
TraesCS5A02G038300.2	TaARF25-5A	5A	TraesCS5D02G045700.2	TaARF25-5D	5D	segmental duplication
TraesCS5B02G039800.1	TaARF25-5B	5B	TraesCS5D02G045700.2	TaARF25-5D	5D	segmental duplication
TraesCS6A02G138600.4	TaARF6-6A	6A	TraesCS6B02G167100.1	TaARF6-6B	6B	segmental duplication
TraesCS6A02G222300.1	TaARF8-6A	6A	TraesCS6B02G258800.1	TaARF8-6B	6B	segmental duplication
TraesCS6A02G113000.1	TaARF5-6A	6A	TraesCS6B02G141300.2	TaARF5-6B	6B	segmental duplication
TraesCS6A02G138600.4	TaARF6-6A	6A	TraesCS6D02G127600.2	TaARF6-6D	6D	segmental duplication
TraesCS6A02G222300.1	TaARF8-6A	6A	TraesCS6D02G212700.1	TaARF8-6D	6D	segmental duplication
TraesCS6A02G113000.1	TaARF5-6A	6A	TraesCS6D02G102300.1	TaARF5-6D	6D	segmental duplication
TraesCS6B02G141300.2	TaARF5-6B	6B	TraesCS6D02G102300.1	TaARF5-6D	6D	segmental duplication
TraesCS6B02G167100.1	TaARF6-6B	6B	TraesCS6D02G127600.2	TaARF6-6D	6D	segmental duplication
TraesCS6B02G258800.1	TaARF8-6B	6B	TraesCS6D02G212700.1	TaARF8-6D	6D	segmental duplication
TraesCS6B02G167100.1	TaARF6-6B	6B	TraesCS7A02G461700.1	TaARF17-7A	7A	segmental duplication
TraesCS6D02G102300.1	TaARF5-6D	6D	TraesCS7B02G316600.1	TaARF19-7B	7B	segmental duplication
TraesCS6D02G102300.1	TaARF5-6D	6D	TraesCS7D02G409700.1	TaARF19-7D	7D	segmental duplication
TraesCS7A02G160800.1	TaARF16-7A	7A	TraesCS7B02G065800.2	TaARF16-7B	7B	segmental duplication
TraesCS7A02G416400.1	TaARF19-7A	7A	TraesCS7B02G316600.1	TaARF19-7B	7B	segmental duplication
TraesCS7A02G446900.1	TaARF18-7A	7A	TraesCS7B02G346700.1	TaARF18-7B	7B	segmental duplication
TraesCS7A02G461700.1	TaARF17-7A	7A	TraesCS7B02G363100.1	TaARF17-7B	7B	segmental duplication
TraesCS7A02G252000.2	TaARF21-7A	7A	TraesCS7B02G138900.6	TaARF21-7B	7B	segmental duplication
TraesCS7A02G160800.1	TaARF16-7A	7A	TraesCS7D02G161900.1	TaARF16-7D	7D	segmental duplication
TraesCS7A02G416400.1	TaARF19-7A	7A	TraesCS7D02G409700.1	TaARF19-7D	7D	segmental duplication
TraesCS7A02G446900.1	TaARF18-7A	7A	TraesCS7D02G436800.1	TaARF18-7D	7D	segmental duplication
TraesCS7A02G461700.1	TaARF17-7A	7A	TraesCS7D02G449900.2	TaARF17-7D	7D	segmental duplication
TraesCS7A02G475600.1	TaARF13-7A-1	7A	TraesCS7D02G463000.1	TaARF13-7D	7D	segmental duplication
TraesCS7A02G252000.2	TaARF21-7A	7A	TraesCS7D02G250100.4	TaARF21-7D	7D	segmental duplication
TraesCS7B02G316600.1	TaARF19-7B	7B	TraesCS7D02G409700.1	TaARF19-7D	7D	segmental duplication
TraesCS7B02G346700.1	TaARF18-7B	7B	TraesCS7D02G436800.1	TaARF18-7D	7D	segmental duplication
TraesCS7B02G363100.1	TaARF17-7B	7B	TraesCS7D02G449900.2	TaARF17-7D	7D	segmental duplication
TraesCS7B02G065800.2	TaARF16-7B	7B	TraesCS7D02G161900.1	TaARF16-7D	7D	segmental duplication
TraesCS7B02G138900.6	TaARF21-7B	7B	TraesCS7D02G250100.4	TaARF21-7D	7D	segmental duplication
TraesCS3A02G442000.1	TaARF4-3A-1	3A	TraesCS3A02G449300.3	TaARF4-3A-2	3A	tandem duplication
TraesCS3B02G475800.1	TaARF4-3B-1	3B	TraesCS3B02G486000.2	TaARF4-3B-2	3B	tandem duplication
TraesCS3D02G434700.1	TaARF4-3D-1	3D	TraesCS3D02G442000.7	TaARF4-3D-2	3D	tandem duplication
TraesCS7A02G475600.1	TaARF13-7A-1	7A	TraesCS7A02G475700.1	TaARF13-7A-2	7A	tandem duplication
