# Supplementary material for: Key auxin response factor (ARF) genes constraining wheat tillering of mutant dmc
Source: PeerJ journal article supplement (doi:10.7717/peerj.12221), 2021-09-21
Supplement: Supplementary_files_1.zip [file Plate1---admin_2020-09-08 17-52-17_CT023283 - Quantification Cq Results.xlsx]

## Sheet: 0
	Well	Fluor	Target	Content	Sample	Biological Set Name	Cq	Cq Mean	Cq Std. Dev	Starting Quantity (SQ)	Log Starting Quantity	SQ Mean	SQ Std. Dev	Set Point	Well Note
	A01	SYBR	Actin	Unkn-01	301 0h		26.2775	26.2744	0.0610183					60
	A02	SYBR	Actin	Unkn-01	301 0h		26.2119	26.2744	0.0610183					60
	A03	SYBR	Actin	Unkn-01	301 0h		26.3338	26.2744	0.0610183					60
	A04	SYBR	Actin	Unkn-02	dmc oh		24.9603	25.027	0.129264					60
	A05	SYBR	Actin	Unkn-02	dmc oh		25.176	25.027	0.129264					60
	A06	SYBR	Actin	Unkn-02	dmc oh		24.9447	25.027	0.129264					60
	A07	SYBR	Actin	Unkn-03	301 1h		23.764	23.786	0.0569682					60
	A08	SYBR	Actin	Unkn-03	301 1h		23.7433	23.786	0.0569682					60
	A09	SYBR	Actin	Unkn-03	301 1h		23.8507	23.786	0.0569682					60
	A10	SYBR	Actin	Unkn-04	dmc 1h		25.7137	25.6016	0.411461					60
	A11	SYBR	Actin	Unkn-04	dmc 1h		25.9453	25.6016	0.411461					60
	A12	SYBR	Actin	Unkn-04	dmc 1h		25.8456	25.6016	0.411461					60
	B01	SYBR	Actin	Unkn-05	301 2h		24.1091	24.1109	0.16472					60
	B02	SYBR	Actin	Unkn-05	301 2h		23.9472	24.1109	0.16472					60
	B03	SYBR	Actin	Unkn-05	301 2h		24.2766	24.1109	0.16472					60
	B04	SYBR	Actin	Unkn-06	dmc 2h		22.6261	22.525	0.0886785					60
	B05	SYBR	Actin	Unkn-06	dmc 2h		22.4606	22.525	0.0886785					60
	B06	SYBR	Actin	Unkn-06	dmc 2h		22.4883	22.525	0.0886785					60
	B07	SYBR	RT1	Unkn-07	301 0h		31.7276	31.6434	0.2765					60
	B08	SYBR	RT1	Unkn-07	301 0h		31.7609	31.6434	0.2765					60
	B09	SYBR	RT1	Unkn-07	301 0h		31.8418	31.6434	0.2765					60
	B10	SYBR	RT1	Unkn-08	dmc oh		31.5652	31.3536	0.599357					60
	B11	SYBR	RT1	Unkn-08	dmc oh		31.7486	31.3536	0.599357					60
	B12	SYBR	RT1	Unkn-08	dmc oh		31.9471	31.3536	0.599357					60
	C01	SYBR	RT1	Unkn-09	301 1h		30.4994	30.4473	0.222341					60
	C02	SYBR	RT1	Unkn-09	301 1h		30.2036	30.4473	0.222341					60
	C03	SYBR	RT1	Unkn-09	301 1h		30.639	30.4473	0.222341					60
	C04	SYBR	RT1	Unkn-10	dmc 1h		30.7047	30.6323	0.463814					60
	C05	SYBR	RT1	Unkn-10	dmc 1h		31.0556	30.6323	0.463814					60
	C06	SYBR	RT1	Unkn-10	dmc 1h		31.1365	30.6323	0.463814					60
	C07	SYBR	RT1	Unkn-11	301 2h		29.7512	29.5894	0.145796					60
	C08	SYBR	RT1	Unkn-11	301 2h		29.4682	29.5894	0.145796					60
	C09	SYBR	RT1	Unkn-11	301 2h		29.5489	29.5894	0.145796					60
	C10	SYBR	RT1	Unkn-12	dmc 2h		28.6501	28.4884	0.275713					60
	C11	SYBR	RT1	Unkn-12	dmc 2h		28.6451	28.4884	0.275713					60
	C12	SYBR	RT1	Unkn-12	dmc 2h		28.17	28.4884	0.275713					60
	D01	SYBR	RT2	Unkn-13	301 0h		28.7125	28.8268	0.22539					60
	D02	SYBR	RT2	Unkn-13	301 0h		28.6815	28.8268	0.22539					60
	D03	SYBR	RT2	Unkn-13	301 0h		29.0864	28.8268	0.22539					60
	D04	SYBR	RT2	Unkn-14	dmc oh		29.1451	28.9848	0.187723					60
	D05	SYBR	RT2	Unkn-14	dmc oh		29.0312	28.9848	0.187723					60
	D06	SYBR	RT2	Unkn-14	dmc oh		28.7783	28.9848	0.187723					60
	D07	SYBR	RT2	Unkn-15	301 1h		26.1378	26.6223	0.462049					60
	D08	SYBR	RT2	Unkn-15	301 1h		26.2456	26.6223	0.462049					60
	D09	SYBR	RT2	Unkn-15	301 1h		26.4834	26.6223	0.462049					60
	D10	SYBR	RT2	Unkn-16	dmc 1h		27.9021	28.4731	0.660248					60
	D11	SYBR	RT2	Unkn-16	dmc 1h		28.3211	28.4731	0.660248					60
	D12	SYBR	RT2	Unkn-16	dmc 1h		28.1961	28.4731	0.660248					60
	E01	SYBR	RT2	Unkn-17	301 2h		26.9697	26.6114	0.32218					60
	E02	SYBR	RT2	Unkn-17	301 2h		26.3456	26.6114	0.32218					60
	E03	SYBR	RT2	Unkn-17	301 2h		26.5189	26.6114	0.32218					60
	E04	SYBR	RT2	Unkn-18	dmc 2h		25.1818	25.1191	0.128166					60
	E05	SYBR	RT2	Unkn-18	dmc 2h		25.2039	25.1191	0.128166					60
	E06	SYBR	RT2	Unkn-18	dmc 2h		24.9717	25.1191	0.128166					60
	E07	SYBR	RT3	Unkn-19	301 0h		26.4969	26.5855	0.120205					60
	E08	SYBR	RT3	Unkn-19	301 0h		26.5373	26.5855	0.120205					60
	E09	SYBR	RT3	Unkn-19	301 0h		26.7223	26.5855	0.120205					60
	E10	SYBR	RT3	Unkn-20	dmc oh		26.9015	26.5625	0.416087					60
	E11	SYBR	RT3	Unkn-20	dmc oh		26.6879	26.5625	0.416087					60
	E12	SYBR	RT3	Unkn-20	dmc oh		26.7981	26.5625	0.416087					60
	F01	SYBR	RT3	Unkn-21	301 1h		24.3026	23.9661	0.434568					60
	F02	SYBR	RT3	Unkn-21	301 1h		24.1203	23.9661	0.434568					60
	F03	SYBR	RT3	Unkn-21	301 1h		24.2755	23.9661	0.434568					60
	F04	SYBR	RT3	Unkn-22	dmc 1h		25.4884	25.2091	0.276504					60
	F05	SYBR	RT3	Unkn-22	dmc 1h		25.2034	25.2091	0.276504					60
	F06	SYBR	RT3	Unkn-22	dmc 1h		24.9355	25.2091	0.276504					60
	F07	SYBR	RT3	Unkn-23	301 2h		23.6414	23.5833	0.0686157					60
	F08	SYBR	RT3	Unkn-23	301 2h		23.5076	23.5833	0.0686157					60
	F09	SYBR	RT3	Unkn-23	301 2h		23.6011	23.5833	0.0686157					60
	F10	SYBR	RT3	Unkn-24	dmc 2h		23.4342	23.7426	0.342596					60
	F11	SYBR	RT3	Unkn-24	dmc 2h		23.5114	23.7426	0.342596					60
	F12	SYBR	RT3	Unkn-24	dmc 2h		23.6823	23.7426	0.342596					60
	G01	SYBR	RT4	Unkn-25	301 0h		29.1475	29.1646	0.0599647					60
	G02	SYBR	RT4	Unkn-25	301 0h		29.2313	29.1646	0.0599647					60
	G03	SYBR	RT4	Unkn-25	301 0h		29.1151	29.1646	0.0599647					60
	G04	SYBR	RT4	Unkn-26	dmc oh		29.0996	28.8356	0.335483					60
	G05	SYBR	RT4	Unkn-26	dmc oh		28.9581	28.8356	0.335483					60
	G06	SYBR	RT4	Unkn-26	dmc oh		28.9492	28.8356	0.335483					60
	G07	SYBR	RT4	Unkn-27	301 1h		28.107	28.1811	0.0661198					60
	G08	SYBR	RT4	Unkn-27	301 1h		28.2342	28.1811	0.0661198					60
	G09	SYBR	RT4	Unkn-27	301 1h		28.202	28.1811	0.0661198					60
	G10	SYBR	RT4	Unkn-28	dmc 1h		29.0168	29.03	0.187122					60
	G11	SYBR	RT4	Unkn-28	dmc 1h		28.8498	29.03	0.187122					60
	G12	SYBR	RT4	Unkn-28	dmc 1h		29.2234	29.03	0.187122					60
	H01	SYBR	RT4	Unkn-29	301 2h		27.5813	27.7079	0.324154					60
	H02	SYBR	RT4	Unkn-29	301 2h		27.5441	27.7079	0.324154					60
	H03	SYBR	RT4	Unkn-29	301 2h		27.4984	27.7079	0.324154					60
	H04	SYBR	RT4	Unkn-30	dmc 2h		27.3484	27.2593	0.101281					60
	H05	SYBR	RT4	Unkn-30	dmc 2h		27.1492	27.2593	0.101281					60
	H06	SYBR	RT4	Unkn-30	dmc 2h		27.2804	27.2593	0.101281					60

## Sheet: Run Information
File Name	admin_2020-09-08 17-52-17_CT023283.pcrd
Created By User	admin
Notes
ID
Run Started	09/08/2020 09:52:53 UTC
Run Ended	09/08/2020 11:14:24 UTC
Sample Vol	20
Lid Temp	105
Protocol File Name	yingguang.prcl
Plate Setup File Name	PLATE1.pltd
Base Serial Number	BR001903
Optical Head Serial Number	788BR01821
CFX Manager Version	3.1.1517.0823.
