# Supplementary material for: Key auxin response factor (ARF) genes constraining wheat tillering of mutant dmc
Source: PeerJ journal article supplement (doi:10.7717/peerj.12221), 2021-09-21
Supplement: Supplementary_files_1.zip [file Plate1-admin_2020-08-14 10-23-45_CT023283 - Quantification Summary.xlsx]

## Sheet: 0
	Well	Fluor	Target	Content	Sample	Biological Set Name	Cq	Cq Mean	Cq Std. Dev	Starting Quantity (SQ)	Log Starting Quantity	SQ Mean	SQ Std. Dev	Set Point	Well Note
	A01	SYBR	Actin	Unkn-01	WT1		26.6099	26.9206	0.277817					60
	A02	SYBR	Actin	Unkn-01	WT1		27.007	26.9206	0.277817					60
	A03	SYBR	Actin	Unkn-01	WT1		27.145	26.9206	0.277817					60
	A04	SYBR	Actin	Unkn-02	DMC1		28.335	28.3862	0.101843					60
	A05	SYBR	Actin	Unkn-02	DMC1		28.5034	28.3862	0.101843					60
	A06	SYBR	Actin	Unkn-02	DMC1		28.32	28.3862	0.101843					60
	A07	SYBR	RT1	Unkn-03	WT1		30.3022	30.1379	0.448354					60
	A08	SYBR	RT1	Unkn-03	WT1		30.6306	30.1379	0.448354					60
	A09	SYBR	RT1	Unkn-03	WT1		30.4809	30.1379	0.448354					60
	A10	SYBR	RT1	Unkn-04	DMC1		30.6454	30.87	0.424802					60
	A11	SYBR	RT1	Unkn-04	DMC1		30.7368	30.87	0.424802					60
	A12	SYBR	RT1	Unkn-04	DMC1		30.5277	30.87	0.424802					60
	B01	SYBR	RT2	Unkn-05	WT1		26.6071	26.6479	0.149891					60
	B02	SYBR	RT2	Unkn-05	WT1		26.5226	26.6479	0.149891					60
	B03	SYBR	RT2	Unkn-05	WT1		26.8139	26.6479	0.149891					60
	B04	SYBR	RT2	Unkn-06	DMC1		27.9264	27.8787	0.0948086					60
	B05	SYBR	RT2	Unkn-06	DMC1		27.7696	27.8787	0.0948086					60
	B06	SYBR	RT2	Unkn-06	DMC1		27.9403	27.8787	0.0948086					60
	B07	SYBR	RT3	Unkn-07	WT1		26.2079	26.1304	0.497694					60
	B08	SYBR	RT3	Unkn-07	WT1		26.1844	26.1304	0.497694					60
	B09	SYBR	RT3	Unkn-07	WT1		26.5989	26.1304	0.497694					60
	B10	SYBR	RT3	Unkn-08	DMC1		25.0252	25.916	1.39446					60
	B11	SYBR	RT3	Unkn-08	DMC1		25.0623	25.916	1.39446					60
	B12	SYBR	RT3	Unkn-08	DMC1		25.1605	25.916	1.39446					60
	C01	SYBR	RT4	Unkn-09	WT1		26.095	25.9345	0.651177					60
	C02	SYBR	RT4	Unkn-09	WT1		26.4904	25.9345	0.651177					60
	C03	SYBR	RT4	Unkn-09	WT1		26.2181	25.9345	0.651177					60
	C04	SYBR	RT4	Unkn-10	DMC1		26.3268	26.51	0.183336					60
	C05	SYBR	RT4	Unkn-10	DMC1		26.5098	26.51	0.183336					60
	C06	SYBR	RT4	Unkn-10	DMC1		26.6935	26.51	0.183336					60
	C07	SYBR	Actin	Unkn-11	WT2		27.4204	27.413	0.106104					60
	C08	SYBR	Actin	Unkn-11	WT2		27.3034	27.413	0.106104					60
	C09	SYBR	Actin	Unkn-11	WT2		27.5152	27.413	0.106104					60
	C10	SYBR	Actin	Unkn-12	DMC2		27.0178	27.1779	0.20321					60
	C11	SYBR	Actin	Unkn-12	DMC2		27.1094	27.1779	0.20321					60
	C12	SYBR	Actin	Unkn-12	DMC2		27.4065	27.1779	0.20321					60
	D01	SYBR	RT1	Unkn-13	WT2		29.8597	29.9582	0.223425					60
	D02	SYBR	RT1	Unkn-13	WT2		29.801	29.9582	0.223425					60
	D03	SYBR	RT1	Unkn-13	WT2		30.214	29.9582	0.223425					60
	D04	SYBR	RT1	Unkn-14	DMC2		29.9107	30.1204	0.374186					60
	D05	SYBR	RT1	Unkn-14	DMC2		29.898	30.1204	0.374186					60
	D06	SYBR	RT1	Unkn-14	DMC2		30.0524	30.1204	0.374186					60
	D07	SYBR	RT2	Unkn-15	WT2		26.3039	26.2767	0.227593					60
	D08	SYBR	RT2	Unkn-15	WT2		26.0367	26.2767	0.227593					60
	D09	SYBR	RT2	Unkn-15	WT2		26.4895	26.2767	0.227593					60
	D10	SYBR	RT2	Unkn-16	DMC2		26.4522	26.3556	0.200259					60
	D11	SYBR	RT2	Unkn-16	DMC2		26.1254	26.3556	0.200259					60
	D12	SYBR	RT2	Unkn-16	DMC2		26.4893	26.3556	0.200259					60
	E01	SYBR	RT3	Unkn-17	WT2		22.4853	23.4491	1.7661					60
	E02	SYBR	RT3	Unkn-17	WT2		22.3341	23.4491	1.7661					60
	E03	SYBR	RT3	Unkn-17	WT2		22.5277	23.4491	1.7661					60
	E04	SYBR	RT3	Unkn-18	DMC2		22.4566	23.0146	0.999335					60
	E05	SYBR	RT3	Unkn-18	DMC2		22.3002	23.0146	0.999335					60
	E06	SYBR	RT3	Unkn-18	DMC2		22.5869	23.0146	0.999335					60
	E07	SYBR	RT4	Unkn-19	WT2		26.2998	26.3661	0.0988787					60
	E08	SYBR	RT4	Unkn-19	WT2		26.3189	26.3661	0.0988787					60
	E09	SYBR	RT4	Unkn-19	WT2		26.4798	26.3661	0.0988787					60
	E10	SYBR	RT4	Unkn-20	DMC2		26.1385	26.3378	0.174816					60
	E11	SYBR	RT4	Unkn-20	DMC2		26.4098	26.3378	0.174816					60
	E12	SYBR	RT4	Unkn-20	DMC2		26.4651	26.3378	0.174816					60
	F01	SYBR	Actin	Unkn-21	WT3		26.8723	26.8096	0.0637556					60
	F02	SYBR	Actin	Unkn-21	WT3		26.7448	26.8096	0.0637556					60
	F03	SYBR	Actin	Unkn-21	WT3		26.8117	26.8096	0.0637556					60
	F04	SYBR	Actin	Unkn-22	DMC3		26.7391	26.7328	0.0894884					60
	F05	SYBR	Actin	Unkn-22	DMC3		26.819	26.7328	0.0894884					60
	F06	SYBR	Actin	Unkn-22	DMC3		26.6403	26.7328	0.0894884					60
	F07	SYBR	RT1	Unkn-23	WT3		30.0236	29.9118	0.0980759					60
	F08	SYBR	RT1	Unkn-23	WT3		29.8712	29.9118	0.0980759					60
	F09	SYBR	RT1	Unkn-23	WT3		29.8405	29.9118	0.0980759					60
	F10	SYBR	RT1	Unkn-24	DMC3		29.0601	29.0515	0.0305525					60
	F11	SYBR	RT1	Unkn-24	DMC3		29.0175	29.0515	0.0305525					60
	F12	SYBR	RT1	Unkn-24	DMC3		29.0768	29.0515	0.0305525					60
	G01	SYBR	RT2	Unkn-25	WT3		26.6166	26.3876	0.198293					60
	G02	SYBR	RT2	Unkn-25	WT3		26.2731	26.3876	0.198293					60
	G03	SYBR	RT2	Unkn-25	WT3		26.2731	26.3876	0.198293					60
	G04	SYBR	RT2	Unkn-26	DMC3		25.275	25.4204	0.129796					60
	G05	SYBR	RT2	Unkn-26	DMC3		25.5244	25.4204	0.129796					60
	G06	SYBR	RT2	Unkn-26	DMC3		25.462	25.4204	0.129796					60
	G07	SYBR	RT3	Unkn-27	WT3		26.306	26.6278	0.431436					60
	G08	SYBR	RT3	Unkn-27	WT3		26.418	26.6278	0.431436					60
	G09	SYBR	RT3	Unkn-27	WT3		26.4593	26.6278	0.431436					60
	G10	SYBR	RT3	Unkn-28	DMC3		22.7403	23.6027	1.05662					60
	G11	SYBR	RT3	Unkn-28	DMC3		22.7813	23.6027	1.05662					60
	G12	SYBR	RT3	Unkn-28	DMC3		23.2865	23.6027	1.05662					60
	H01	SYBR	RT4	Unkn-29	WT3		26.9791	26.711	0.242256					60
	H02	SYBR	RT4	Unkn-29	WT3		26.6462	26.711	0.242256					60
	H03	SYBR	RT4	Unkn-29	WT3		26.5077	26.711	0.242256					60
	H04	SYBR	RT4	Unkn-30	DMC3		25.1659	25.3145	0.184533					60
	H05	SYBR	RT4	Unkn-30	DMC3		25.5211	25.3145	0.184533					60
	H06	SYBR	RT4	Unkn-30	DMC3		25.2565	25.3145	0.184533					60

## Sheet: Run Information
File Name	admin_2020-08-14 10-23-45_CT023283.pcrd
Created By User	admin
Notes
ID
Run Started	08/19/2020 07:09:50 UTC
Run Ended	08/19/2020 08:52:36 UTC
Sample Vol	20
Lid Temp	105
Protocol File Name	yingguang.prcl
Plate Setup File Name	PLATE.pltd
Base Serial Number	BR001903
Optical Head Serial Number	788BR01821
CFX Manager Version	3.1.1517.0823.
