# Supplementary material for: Key auxin response factor (ARF) genes constraining wheat tillering of mutant dmc
Source: PeerJ journal article supplement (doi:10.7717/peerj.12221), 2021-09-21
Supplement: Supplementary_files_1.zip [file Plate2---admin_2020-09-08 19-30-54_CT023283 - Quantification Cq Results.xlsx]

## Sheet: 0
	Well	Fluor	Target	Content	Sample	Biological Set Name	Cq	Cq Mean	Cq Std. Dev	Starting Quantity (SQ)	Log Starting Quantity	SQ Mean	SQ Std. Dev	Set Point	Well Note
	A01	SYBR	Actin	Unkn-01	301 0H		26.2338	26.1637	0.0804542					60
	A02	SYBR	Actin	Unkn-01	301 0H		26.1813	26.1637	0.0804542					60
	A03	SYBR	Actin	Unkn-01	301 0H		26.0758	26.1637	0.0804542					60
	A04	SYBR	Actin	Unkn-02	DMC 0H		25.2316	24.8034	0.497365					60
	A05	SYBR	Actin	Unkn-02	DMC 0H		25.1358	24.8034	0.497365					60
	A06	SYBR	Actin	Unkn-02	DMC 0H		25.0427	24.8034	0.497365					60
	A07	SYBR	Actin	Unkn-03	301 1H		23.6169	23.6205	0.0491166					60
	A08	SYBR	Actin	Unkn-03	301 1H		23.5732	23.6205	0.0491166					60
	A09	SYBR	Actin	Unkn-03	301 1H		23.6712	23.6205	0.0491166					60
	A10	SYBR	Actin	Unkn-04	DMC 1H		25.5173	25.479	0.0541426					60
	A11	SYBR	Actin	Unkn-04	DMC 1H		25.4407	25.479	0.0541426					60
	A12	SYBR	Actin	Unkn-04	DMC 1H		25.48	0	0			0	0	60
	B01	SYBR	Actin	Unkn-05	301 2H		24.3689	24.1678	0.174325					60
	B02	SYBR	Actin	Unkn-05	301 2H		24.0755	24.1678	0.174325					60
	B03	SYBR	Actin	Unkn-05	301 2H		24.059	24.1678	0.174325					60
	B04	SYBR	Actin	Unkn-06	DMC 2H		22.3379	22.5418	0.235559					60
	B05	SYBR	Actin	Unkn-06	DMC 2H		22.4879	22.5418	0.235559					60
	B06	SYBR	Actin	Unkn-06	DMC 2H		22.7996	22.5418	0.235559					60
	B07	SYBR	RT1	Unkn-07	301 0H		31.0478	30.9634	0.246561					60
	B08	SYBR	RT1	Unkn-07	301 0H		31.1568	30.9634	0.246561					60
	B09	SYBR	RT1	Unkn-07	301 0H		30.6858	30.9634	0.246561					60
	B10	SYBR	RT1	Unkn-08	DMC 0H		31.1127	30.8296	0.246716					60
	B11	SYBR	RT1	Unkn-08	DMC 0H		30.6603	30.8296	0.246716					60
	B12	SYBR	RT1	Unkn-08	DMC 0H		30.7159	30.8296	0.246716					60
	C01	SYBR	RT1	Unkn-09	301 1H		29.1335	28.9744	0.145316					60
	C02	SYBR	RT1	Unkn-09	301 1H		28.8488	28.9744	0.145316					60
	C03	SYBR	RT1	Unkn-09	301 1H		28.9407	28.9744	0.145316					60
	C04	SYBR	RT1	Unkn-10	DMC 1H		30.2546	30.2921	0.370355					60
	C05	SYBR	RT1	Unkn-10	DMC 1H		29.9419	30.2921	0.370355					60
	C06	SYBR	RT1	Unkn-10	DMC 1H		30.3797	30.2921	0.370355					60
	C07	SYBR	RT1	Unkn-11	301 2H		29.6377	29.7468	0.250128					60
	C08	SYBR	RT1	Unkn-11	301 2H		29.5697	29.7468	0.250128					60
	C09	SYBR	RT1	Unkn-11	301 2H		30.0329	29.7468	0.250128					60
	C10	SYBR	RT1	Unkn-12	DMC 2H		28.7326	27.1924	2.50852					60
	C11	SYBR	RT1	Unkn-12	DMC 2H		28.5467	27.1924	2.50852					60
	C12	SYBR	RT1	Unkn-12	DMC 2H		28.5978	27.1924	2.50852					60
	D01	SYBR	RT5	Unkn-13	301 0H		28.4176	28.2048	0.213048					60
	D02	SYBR	RT5	Unkn-13	301 0H		27.9915	28.2048	0.213048					60
	D03	SYBR	RT5	Unkn-13	301 0H		28.2054	28.2048	0.213048					60
	D04	SYBR	RT5	Unkn-14	DMC 0H		28.2438	28.309	0.0588279					60
	D05	SYBR	RT5	Unkn-14	DMC 0H		28.325	28.309	0.0588279					60
	D06	SYBR	RT5	Unkn-14	DMC 0H		28.3581	28.309	0.0588279					60
	D07	SYBR	RT5	Unkn-15	301 1H		28.3296	28.3911	0.0558229					60
	D08	SYBR	RT5	Unkn-15	301 1H		28.4386	28.3911	0.0558229					60
	D09	SYBR	RT5	Unkn-15	301 1H		28.4052	28.3911	0.0558229					60
	D10	SYBR	RT5	Unkn-16	DMC 1H		28.3939	28.1834	0.18295					60
	D11	SYBR	RT5	Unkn-16	DMC 1H		28.0933	28.1834	0.18295					60
	D12	SYBR	RT5	Unkn-16	DMC 1H		28.063	28.1834	0.18295					60
	E01	SYBR	RT5	Unkn-17	301 2H		28.5682	28.3309	0.286486					60
	E02	SYBR	RT5	Unkn-17	301 2H		28.4117	28.3309	0.286486					60
	E03	SYBR	RT5	Unkn-17	301 2H		28.0126	28.3309	0.286486					60
	E04	SYBR	RT5	Unkn-18	DMC 2H		28.3683	28.2869	0.22898					60
	E05	SYBR	RT5	Unkn-18	DMC 2H		28.0283	28.2869	0.22898					60
	E06	SYBR	RT5	Unkn-18	DMC 2H		28.464	28.2869	0.22898					60
	E07	SYBR	RT6	Unkn-19	301 0H		27.5621	27.735	0.370238					60
	E08	SYBR	RT6	Unkn-19	301 0H		27.5368	27.735	0.370238					60
	E09	SYBR	RT6	Unkn-19	301 0H		27.506	27.735	0.370238					60
	E10	SYBR	RT6	Unkn-20	DMC 0H		27.865	27.6685	0.173044					60
	E11	SYBR	RT6	Unkn-20	DMC 0H		27.6017	27.6685	0.173044					60
	E12	SYBR	RT6	Unkn-20	DMC 0H		27.5388	27.6685	0.173044					60
	F01	SYBR	RT6	Unkn-21	301 1H		25.5143	25.6966	0.227636					60
	F02	SYBR	RT6	Unkn-21	301 1H		25.6239	25.6966	0.227636					60
	F03	SYBR	RT6	Unkn-21	301 1H		25.9517	25.6966	0.227636					60
	F04	SYBR	RT6	Unkn-22	DMC 1H		27.7207	27.409	0.302072					60
	F05	SYBR	RT6	Unkn-22	DMC 1H		27.1175	27.409	0.302072					60
	F06	SYBR	RT6	Unkn-22	DMC 1H		27.3889	27.409	0.302072					60
	F07	SYBR	RT6	Unkn-23	301 2H		25.8273	25.8926	0.0594512					60
	F08	SYBR	RT6	Unkn-23	301 2H		25.9435	25.8926	0.0594512					60
	F09	SYBR	RT6	Unkn-23	301 2H		25.9072	25.8926	0.0594512					60
	F10	SYBR	RT6	Unkn-24	DMC 2H		24.0107	25.2659	2.60675					60
	F11	SYBR	RT6	Unkn-24	DMC 2H		23.5243	25.2659	2.60675					60
	F12	SYBR	RT6	Unkn-24	DMC 2H		23.7628	25.2659	2.60675					60
	G01	SYBR	RT7	Unkn-25	301 0H		30.8598	30.9146	0.0561468					60
	G02	SYBR	RT7	Unkn-25	301 0H		30.912	30.9146	0.0561468					60
	G03	SYBR	RT7	Unkn-25	301 0H		30.972	30.9146	0.0561468					60
	G04	SYBR	RT7	Unkn-26	DMC 0H		30.4964	30.4305	0.0860477					60
	G05	SYBR	RT7	Unkn-26	DMC 0H		30.3331	30.4305	0.0860477					60
	G06	SYBR	RT7	Unkn-26	DMC 0H		30.4619	30.4305	0.0860477					60
	G07	SYBR	RT7	Unkn-27	301 1H		29.3563	29.234	0.134658					60
	G08	SYBR	RT7	Unkn-27	301 1H		29.2559	29.234	0.134658					60
	G09	SYBR	RT7	Unkn-27	301 1H		29.0897	29.234	0.134658					60
	G10	SYBR	RT7	Unkn-28	DMC 1H		30.49	30.2513	0.241902					60
	G11	SYBR	RT7	Unkn-28	DMC 1H		30.2574	30.2513	0.241902					60
	G12	SYBR	RT7	Unkn-28	DMC 1H		30.0063	30.2513	0.241902					60
	H01	SYBR	RT7	Unkn-29	301 2H		30.0256	29.689	0.338122					60
	H02	SYBR	RT7	Unkn-29	301 2H		29.6922	29.689	0.338122					60
	H03	SYBR	RT7	Unkn-29	301 2H		29.7493	29.689	0.338122					60
	H04	SYBR	RT7	Unkn-30	DMC 2H		28.7628	28.9997	0.215139					60
	H05	SYBR	RT7	Unkn-30	DMC 2H		29.0533	28.9997	0.215139					60
	H06	SYBR	RT7	Unkn-30	DMC 2H		29.1829	28.9997	0.215139					60

## Sheet: Run Information
File Name	admin_2020-09-08 19-30-54_CT023283.pcrd
Created By User	admin
Notes
ID
Run Started	09/08/2020 11:31:16 UTC
Run Ended	09/08/2020 12:52:23 UTC
Sample Vol	20
Lid Temp	105
Protocol File Name	yingguang.prcl
Plate Setup File Name	PLATE2.pltd
Base Serial Number	BR001903
Optical Head Serial Number	788BR01821
CFX Manager Version	3.1.1517.0823.
