# Supplementary material for: Key auxin response factor (ARF) genes constraining wheat tillering of mutant dmc
Source: PeerJ journal article supplement (doi:10.7717/peerj.12221), 2021-09-21
Supplement: Supplementary_files_1.zip [file Plate2-admin_2020-08-19 17-30-50_CT023283 - Quantification Summary.xlsx]

## Sheet: 0
	Well	Fluor	Target	Content	Sample	Biological Set Name	Cq	Cq Mean	Cq Std. Dev	Starting Quantity (SQ)	Log Starting Quantity	SQ Mean	SQ Std. Dev	Set Point	Well Note
	A01	SYBR	Actin	Unkn-01	WT1		27.1406	27.0143	0.228544					60
	A02	SYBR	Actin	Unkn-01	WT1		27.1518	27.0143	0.228544					60
	A03	SYBR	Actin	Unkn-01	WT1		26.7505	27.0143	0.228544					60
	A04	SYBR	Actin	Unkn-02	DMC1		28.433	28.6597	0.390145					60
	A05	SYBR	Actin	Unkn-02	DMC1		28.6916	28.6597	0.390145					60
	A06	SYBR	Actin	Unkn-02	DMC1		28.2546	28.6597	0.390145					60
	A07	SYBR	RT5	Unkn-03	WT1		30.1229	30.0407	0.333567					60
	A08	SYBR	RT5	Unkn-03	WT1		30.3881	30.0407	0.333567					60
	A09	SYBR	RT5	Unkn-03	WT1		30.0112	30.0407	0.333567					60
	A10	SYBR	RT5	Unkn-04	DMC1		30.0956	30.0826	0.377015					60
	A11	SYBR	RT5	Unkn-04	DMC1		29.9952	30.0826	0.377015					60
	A12	SYBR	RT5	Unkn-04	DMC1		29.7569	30.0826	0.377015					60
	B01	SYBR	RT6	Unkn-05	WT1		26.0328	25.9191	0.134573					60
	B02	SYBR	RT6	Unkn-05	WT1		25.954	25.9191	0.134573					60
	B03	SYBR	RT6	Unkn-05	WT1		25.7705	25.9191	0.134573					60
	B04	SYBR	RT6	Unkn-06	DMC1		27.0695	27.1008	0.0282035					60
	B05	SYBR	RT6	Unkn-06	DMC1		27.1084	27.1008	0.0282035					60
	B06	SYBR	RT6	Unkn-06	DMC1		27.1243	27.1008	0.0282035					60
	B07	SYBR	RT7	Unkn-07	WT1		30.9873	30.9837	0.276026					60
	B08	SYBR	RT7	Unkn-07	WT1		30.7059	30.9837	0.276026					60
	B09	SYBR	RT7	Unkn-07	WT1		31.2579	30.9837	0.276026					60
	B10	SYBR	RT7	Unkn-08	DMC1		31.8146	31.7195	0.0844647					60
	B11	SYBR	RT7	Unkn-08	DMC1		31.6531	31.7195	0.0844647					60
	B12	SYBR	RT7	Unkn-08	DMC1		31.6907	31.7195	0.0844647					60
	C01	SYBR	RT8	Unkn-09	WT1		29.1575	29.2649	0.117924					60
	C02	SYBR	RT8	Unkn-09	WT1		29.2461	29.2649	0.117924					60
	C03	SYBR	RT8	Unkn-09	WT1		29.3911	29.2649	0.117924					60
	C04	SYBR	RT8	Unkn-10	DMC1		30.2355	30.3034	0.0952005					60
	C05	SYBR	RT8	Unkn-10	DMC1		30.4122	30.3034	0.0952005					60
	C06	SYBR	RT8	Unkn-10	DMC1		30.2624	30.3034	0.0952005					60
	C07	SYBR	Actin	Unkn-11	WT2		27.6462	27.6943	0.0824732					60
	C08	SYBR	Actin	Unkn-11	WT2		27.7896	27.6943	0.0824732					60
	C09	SYBR	Actin	Unkn-11	WT2		27.6472	27.6943	0.0824732					60
	C10	SYBR	Actin	Unkn-12	DMC2		27.0783	27.2136	0.117219					60
	C11	SYBR	Actin	Unkn-12	DMC2		27.2851	27.2136	0.117219					60
	C12	SYBR	Actin	Unkn-12	DMC2		27.2774	27.2136	0.117219					60
	D01	SYBR	RT5	Unkn-13	WT2		30.0115	30.1953	0.166278					60
	D02	SYBR	RT5	Unkn-13	WT2		30.239	30.1953	0.166278					60
	D03	SYBR	RT5	Unkn-13	WT2		30.3353	30.1953	0.166278					60
	D04	SYBR	RT5	Unkn-14	DMC2		30.3782	30.2337	0.142372					60
	D05	SYBR	RT5	Unkn-14	DMC2		30.0936	30.2337	0.142372					60
	D06	SYBR	RT5	Unkn-14	DMC2		30.2294	30.2337	0.142372					60
	D07	SYBR	RT6	Unkn-15	WT2		26.2193	26.2345	0.0259795					60
	D08	SYBR	RT6	Unkn-15	WT2		26.2645	26.2345	0.0259795					60
	D09	SYBR	RT6	Unkn-15	WT2		26.2197	26.2345	0.0259795					60
	D10	SYBR	RT6	Unkn-16	DMC2		25.7418	25.8967	0.147168					60
	D11	SYBR	RT6	Unkn-16	DMC2		26.0346	25.8967	0.147168					60
	D12	SYBR	RT6	Unkn-16	DMC2		25.9137	25.8967	0.147168					60
	E01	SYBR	RT7	Unkn-17	WT2		29.8717	29.6919	0.155773					60
	E02	SYBR	RT7	Unkn-17	WT2		29.6057	29.6919	0.155773					60
	E03	SYBR	RT7	Unkn-17	WT2		29.5983	29.6919	0.155773					60
	E04	SYBR	RT7	Unkn-18	DMC2		29.1214	29.2059	0.0904628					60
	E05	SYBR	RT7	Unkn-18	DMC2		29.3013	29.2059	0.0904628					60
	E06	SYBR	RT7	Unkn-18	DMC2		29.1949	29.2059	0.0904628					60
	E07	SYBR	RT8	Unkn-19	WT2		29.7334	29.8506	0.245616					60
	E08	SYBR	RT8	Unkn-19	WT2		29.6855	29.8506	0.245616					60
	E09	SYBR	RT8	Unkn-19	WT2		30.1329	29.8506	0.245616					60
	E10	SYBR	RT8	Unkn-20	DMC2		30.374	30.1717	0.392275					60
	E11	SYBR	RT8	Unkn-20	DMC2		30.4216	30.1717	0.392275					60
	E12	SYBR	RT8	Unkn-20	DMC2		30.2196	30.1717	0.392275					60
	F01	SYBR	Actin	Unkn-21	WT3		27.1565	27.0892	0.115444					60
	F02	SYBR	Actin	Unkn-21	WT3		26.9559	27.0892	0.115444					60
	F03	SYBR	Actin	Unkn-21	WT3		27.1553	27.0892	0.115444					60
	F04	SYBR	Actin	Unkn-22	DMC3		27.0201	27.016	0.170647					60
	F05	SYBR	Actin	Unkn-22	DMC3		26.8433	27.016	0.170647					60
	F06	SYBR	Actin	Unkn-22	DMC3		27.1846	27.016	0.170647					60
	F07	SYBR	RT5	Unkn-23	WT3		30.7991	30.5139	0.253342					60
	F08	SYBR	RT5	Unkn-23	WT3		30.4276	30.5139	0.253342					60
	F09	SYBR	RT5	Unkn-23	WT3		30.315	30.5139	0.253342					60
	F10	SYBR	RT5	Unkn-24	DMC3		31.0753	30.7698	0.359743					60
	F11	SYBR	RT5	Unkn-24	DMC3		30.8607	30.7698	0.359743					60
	F12	SYBR	RT5	Unkn-24	DMC3		30.8733	30.7698	0.359743					60
	G01	SYBR	RT6	Unkn-25	WT3		25.3522	25.3458	0.0227945					60
	G02	SYBR	RT6	Unkn-25	WT3		25.3205	25.3458	0.0227945					60
	G03	SYBR	RT6	Unkn-25	WT3		25.3647	25.3458	0.0227945					60
	G04	SYBR	RT6	Unkn-26	DMC3		25.2289	25.26	0.0290991					60
	G05	SYBR	RT6	Unkn-26	DMC3		25.2866	25.26	0.0290991					60
	G06	SYBR	RT6	Unkn-26	DMC3		25.2646	25.26	0.0290991					60
	G07	SYBR	RT7	Unkn-27	WT3		32.5666	32.6321	0.058211					60
	G08	SYBR	RT7	Unkn-27	WT3		32.6518	32.6321	0.058211					60
	G09	SYBR	RT7	Unkn-27	WT3		32.6779	32.6321	0.058211					60
	G10	SYBR	RT7	Unkn-28	DMC3		29.4462	29.5714	0.11009					60
	G11	SYBR	RT7	Unkn-28	DMC3		29.6529	29.5714	0.11009					60
	G12	SYBR	RT7	Unkn-28	DMC3		29.6152	29.5714	0.11009					60
	H01	SYBR	RT8	Unkn-29	WT3		30.3351	30.1407	0.168533					60
	H02	SYBR	RT8	Unkn-29	WT3		30.0512	30.1407	0.168533					60
	H03	SYBR	RT8	Unkn-29	WT3		30.0359	30.1407	0.168533					60
	H04	SYBR	RT8	Unkn-30	DMC3		28.6899	28.5426	0.13479					60
	H05	SYBR	RT8	Unkn-30	DMC3		28.4255	28.5426	0.13479					60
	H06	SYBR	RT8	Unkn-30	DMC3		28.5122	28.5426	0.13479					60

## Sheet: Run Information
File Name	admin_2020-08-19 17-30-50_CT023283.pcrd
Created By User	admin
Notes
ID
Run Started	08/19/2020 09:34:04 UTC
Run Ended	08/19/2020 11:16:34 UTC
Sample Vol	20
Lid Temp	105
Protocol File Name	yingguang.prcl
Plate Setup File Name	PLATE.pltd
Base Serial Number	BR001903
Optical Head Serial Number	788BR01821
CFX Manager Version	3.1.1517.0823.
