# Supplementary material for: Key auxin response factor (ARF) genes constraining wheat tillering of mutant dmc
Source: PeerJ journal article supplement (doi:10.7717/peerj.12221), 2021-09-21
Supplement: Supplementary_files_1.zip [file Plate3---admin_2020-09-08 21-21-17_CT023283 - Quantification Cq Results.xlsx]

## Sheet: 0
	Well	Fluor	Target	Content	Sample	Biological Set Name	Cq	Cq Mean	Cq Std. Dev	Starting Quantity (SQ)	Log Starting Quantity	SQ Mean	SQ Std. Dev	Set Point	Well Note
	A01	SYBR	Actin	Unkn-01	301 0H		25.7377	26.3108	0.645104					60
	A02	SYBR	Actin	Unkn-01	301 0H		26.0094	26.3108	0.645104					60
	A03	SYBR	Actin	Unkn-01	301 0H		26.1851	26.3108	0.645104					60
	A04	SYBR	Actin	Unkn-02	DMC 0H		27.3803	27.4753	0.180572					60
	A05	SYBR	Actin	Unkn-02	DMC 0H		27.3621	27.4753	0.180572					60
	A06	SYBR	Actin	Unkn-02	DMC 0H		27.6836	27.4753	0.180572					60
	A07	SYBR	Actin	Unkn-03	301 1H		23.3105	23.6762	0.46889					60
	A08	SYBR	Actin	Unkn-03	301 1H		23.5133	23.6762	0.46889					60
	A09	SYBR	Actin	Unkn-03	301 1H		23.4048	23.6762	0.46889					60
	A10	SYBR	Actin	Unkn-04	DMC 1H		24.9625	24.9529	0.108127					60
	A11	SYBR	Actin	Unkn-04	DMC 1H		25.0559	24.9529	0.108127					60
	A12	SYBR	Actin	Unkn-04	DMC 1H		24.8403	24.9529	0.108127					60
	B01	SYBR	Actin	Unkn-05	301 2H		22.9053	22.8096	0.0967863					60
	B02	SYBR	Actin	Unkn-05	301 2H		22.8117	22.8096	0.0967863					60
	B03	SYBR	Actin	Unkn-05	301 2H		22.7118	22.8096	0.0967863					60
	B04	SYBR	Actin	Unkn-06	DMC 2H		24.1064	23.8189	0.295257					60
	B05	SYBR	Actin	Unkn-06	DMC 2H		23.5164	23.8189	0.295257					60
	B06	SYBR	Actin	Unkn-06	DMC 2H		23.8338	23.8189	0.295257					60
	B07	SYBR	RT8	Unkn-07	301 0H		30.5919	30.4904	0.0931465					60
	B08	SYBR	RT8	Unkn-07	301 0H		30.4088	30.4904	0.0931465					60
	B09	SYBR	RT8	Unkn-07	301 0H		30.4705	30.4904	0.0931465					60
	B10	SYBR	RT8	Unkn-08	DMC 0H		30.8852	31.5743	1.41253					60
	B11	SYBR	RT8	Unkn-08	DMC 0H		30.7991	31.5743	1.41253					60
	B12	SYBR	RT8	Unkn-08	DMC 0H		30.6385	31.5743	1.41253					60
	C01	SYBR	RT8	Unkn-09	301 1H		27.7715	27.7386	0.0546035					60
	C02	SYBR	RT8	Unkn-09	301 1H		27.7688	27.7386	0.0546035					60
	C03	SYBR	RT8	Unkn-09	301 1H		27.6756	27.7386	0.0546035					60
	C04	SYBR	RT8	Unkn-10	DMC 1H		28.627	28.9683	0.48546					60
	C05	SYBR	RT8	Unkn-10	DMC 1H		28.7285	28.9683	0.48546					60
	C06	SYBR	RT8	Unkn-10	DMC 1H		28.6494	28.9683	0.48546					60
	C07	SYBR	RT8	Unkn-11	301 2H		28.0665	28.0799	0.0283809					60
	C08	SYBR	RT8	Unkn-11	301 2H		28.0608	28.0799	0.0283809					60
	C09	SYBR	RT8	Unkn-11	301 2H		28.1125	28.0799	0.0283809					60
	C10	SYBR	RT8	Unkn-12	DMC 2H		28.3081	28.4266	0.125571					60
	C11	SYBR	RT8	Unkn-12	DMC 2H		28.4133	28.4266	0.125571					60
	C12	SYBR	RT8	Unkn-12	DMC 2H		28.5582	28.4266	0.125571					60
	D01	SYBR	RT9	Unkn-13	301 0H		27.9509	28.463	0.893146					60
	D02	SYBR	RT9	Unkn-13	301 0H		27.7125	28.463	0.893146					60
	D03	SYBR	RT9	Unkn-13	301 0H		28.2258	28.463	0.893146					60
	D04	SYBR	RT9	Unkn-14	DMC 0H		29.6625	29.9498	0.489789					60
	D05	SYBR	RT9	Unkn-14	DMC 0H		29.4867	29.9498	0.489789					60
	D06	SYBR	RT9	Unkn-14	DMC 0H		29.9001	29.9498	0.489789					60
	D07	SYBR	RT9	Unkn-15	301 1H		24.6716	24.5388	0.142596					60
	D08	SYBR	RT9	Unkn-15	301 1H		24.3881	24.5388	0.142596					60
	D09	SYBR	RT9	Unkn-15	301 1H		24.5566	24.5388	0.142596					60
	D10	SYBR	RT9	Unkn-16	DMC 1H		25.475	25.7882	0.289554					60
	D11	SYBR	RT9	Unkn-16	DMC 1H		25.8433	25.7882	0.289554					60
	D12	SYBR	RT9	Unkn-16	DMC 1H		26.0462	25.7882	0.289554					60
	E01	SYBR	RT9	Unkn-17	301 2H		23.5282	23.6252	0.123027					60
	E02	SYBR	RT9	Unkn-17	301 2H		23.7636	23.6252	0.123027					60
	E03	SYBR	RT9	Unkn-17	301 2H		23.5839	23.6252	0.123027					60
	E04	SYBR	RT9	Unkn-18	DMC 2H		25.2197	25.262	0.265879					60
	E05	SYBR	RT9	Unkn-18	DMC 2H		25.0197	25.262	0.265879					60
	E06	SYBR	RT9	Unkn-18	DMC 2H		25.5464	25.262	0.265879					60
	E07	SYBR	RT10	Unkn-19	301 0H		34.3712	34.416	0.51523					60
	E08	SYBR	RT10	Unkn-19	301 0H		34.1521	34.416	0.51523					60
	E09	SYBR	RT10	Unkn-19	301 0H		33.9246	34.416	0.51523					60
	E10	SYBR	RT10	Unkn-20	DMC 0H		33.1983	32.9151	0.554968					60
	E11	SYBR	RT10	Unkn-20	DMC 0H		33.2712	32.9151	0.554968					60
	E12	SYBR	RT10	Unkn-20	DMC 0H		33.2756	32.9151	0.554968					60
	F01	SYBR	RT10	Unkn-21	301 1H		32.1014	32.5467	0.742734					60
	F02	SYBR	RT10	Unkn-21	301 1H		32.0578	32.5467	0.742734					60
	F03	SYBR	RT10	Unkn-21	301 1H		32.1808	32.5467	0.742734					60
	F04	SYBR	RT10	Unkn-22	DMC 1H		32.8539	32.6736	1.27568					60
	F05	SYBR	RT10	Unkn-22	DMC 1H		32.3202	32.6736	1.27568					60
	F06	SYBR	RT10	Unkn-22	DMC 1H		32.8465	32.6736	1.27568					60
	F07	SYBR	RT10	Unkn-23	301 2H		33.2046	33.4642	0.240505					60
	F08	SYBR	RT10	Unkn-23	301 2H		33.5085	33.4642	0.240505					60
	F09	SYBR	RT10	Unkn-23	301 2H		33.6795	33.4642	0.240505					60
	F10	SYBR	RT10	Unkn-24	DMC 2H		34.4073	33.7677	0.796494					60
	F11	SYBR	RT10	Unkn-24	DMC 2H		34.2755	33.7677	0.796494					60
	F12	SYBR	RT10	Unkn-24	DMC 2H		34.0203	33.7677	0.796494					60
	G01	SYBR	RT11	Unkn-25	301 0H		33.5387	33.9657	0.771015					60
	G02	SYBR	RT11	Unkn-25	301 0H		33.6802	33.9657	0.771015					60
	G03	SYBR	RT11	Unkn-25	301 0H		33.3781	33.9657	0.771015					60
	G04	SYBR	RT11	Unkn-26	DMC 0H		38.7762	38.0148	2.37439					60
	G05	SYBR	RT11	Unkn-26	DMC 0H		38.9538	38.0148	2.37439					60
	G06	SYBR	RT11	Unkn-26	DMC 0H		38.8146	38.0148	2.37439					60
	G07	SYBR	RT11	Unkn-27	301 1H		32.1113	32.4649	0.598044					60
	G08	SYBR	RT11	Unkn-27	301 1H		32.0383	32.4649	0.598044					60
	G09	SYBR	RT11	Unkn-27	301 1H		31.8449	32.4649	0.598044					60
	G10	SYBR	RT11	Unkn-28	DMC 1H		34.108	34.3232	1.11011					60
	G11	SYBR	RT11	Unkn-28	DMC 1H		34.5773	34.3232	1.11011					60
	G12	SYBR	RT11	Unkn-28	DMC 1H		34.2842	34.3232	1.11011					60
	H01	SYBR	RT11	Unkn-29	301 2H		31.7001	31.8487	0.141082					60
	H02	SYBR	RT11	Unkn-29	301 2H		31.9808	31.8487	0.141082					60
	H03	SYBR	RT11	Unkn-29	301 2H		31.8653	31.8487	0.141082					60
	H04	SYBR	RT11	Unkn-30	DMC 2H		35.0273	34.5064	1.0275					60
	H05	SYBR	RT11	Unkn-30	DMC 2H		34.9821	34.5064	1.0275					60
	H06	SYBR	RT11	Unkn-30	DMC 2H		35.2099	34.5064	1.0275					60
	H07	SYBR	RT1	Unkn-31	301 0H		31.8616	32.0429	0.292893					60
	H08	SYBR	RT1	Unkn-31	301 0H		32.3808	32.0429	0.292893					60
	H09	SYBR	RT1	Unkn-31	301 0H		31.8862	32.0429	0.292893					60
	H10	SYBR	RT1	Unkn-32	DMC 0H		32.214	32.137	0.271631					60
	H11	SYBR	RT1	Unkn-32	DMC 0H		32.3618	32.137	0.271631					60
	H12	SYBR	RT1	Unkn-32	DMC 0H		31.8351	32.137	0.271631					60

## Sheet: Run Information
File Name	admin_2020-09-08 21-21-17_CT023283.pcrd
Created By User	admin
Notes
ID
Run Started	09/08/2020 13:21:46 UTC
Run Ended	09/08/2020 14:42:58 UTC
Sample Vol	20
Lid Temp	105
Protocol File Name	yingguang.prcl
Plate Setup File Name	PLATE3.pltd
Base Serial Number	BR001903
Optical Head Serial Number	788BR01821
CFX Manager Version	3.1.1517.0823.
