# Supplementary material for: Key auxin response factor (ARF) genes constraining wheat tillering of mutant dmc
Source: PeerJ journal article supplement (doi:10.7717/peerj.12221), 2021-09-21
Supplement: Supplementary_files_1.zip [file Plate3-admin_2020-08-19 19-22-35_CT023283 - Quantification Summary.xlsx]

## Sheet: 0
	Well	Fluor	Target	Content	Sample	Biological Set Name	Cq	Cq Mean	Cq Std. Dev	Starting Quantity (SQ)	Log Starting Quantity	SQ Mean	SQ Std. Dev	Set Point	Well Note
	A01	SYBR	Actin	Unkn-01	WT1		25.6958	25.5806	0.106297					60
	A02	SYBR	Actin	Unkn-01	WT1		25.4863	25.5806	0.106297					60
	A03	SYBR	Actin	Unkn-01	WT1		25.5598	25.5806	0.106297					60
	A04	SYBR	Actin	Unkn-02	DMC1		26.3221	26.2979	0.0284387					60
	A05	SYBR	Actin	Unkn-02	DMC1		26.305	26.2979	0.0284387					60
	A06	SYBR	Actin	Unkn-02	DMC1		26.2666	26.2979	0.0284387					60
	A07	SYBR	RT9	Unkn-03	WT1		25.1734	25.5853	0.6857					60
	A08	SYBR	RT9	Unkn-03	WT1		25.2057	25.5853	0.6857					60
	A09	SYBR	RT9	Unkn-03	WT1		25.3769	25.5853	0.6857					60
	A10	SYBR	RT9	Unkn-04	DMC1		26.3426	25.9394	0.588499					60
	A11	SYBR	RT9	Unkn-04	DMC1		26.5193	25.9394	0.588499					60
	A12	SYBR	RT9	Unkn-04	DMC1		26.4565	25.9394	0.588499					60
	B01	SYBR	RT10	Unkn-05	WT1		31.5359	31.6575	0.315819					60
	B02	SYBR	RT10	Unkn-05	WT1		31.416	31.6575	0.315819					60
	B03	SYBR	RT10	Unkn-05	WT1		31.4206	31.6575	0.315819					60
	B04	SYBR	RT10	Unkn-06	DMC1		31.0473	31.1236	0.138822					60
	B05	SYBR	RT10	Unkn-06	DMC1		31.0396	31.1236	0.138822					60
	B06	SYBR	RT10	Unkn-06	DMC1		31.2838	31.1236	0.138822					60
	B07	SYBR	RT11	Unkn-07	WT1		34.4903	34.4625	1.82504					60
	B08	SYBR	RT11	Unkn-07	WT1		34.8056	34.4625	1.82504					60
	B09	SYBR	RT11	Unkn-07	WT1		34.6917	34.4625	1.82504					60
	B10	SYBR	RT11	Unkn-08	DMC1		32.8926	33.2077	1.27512					60
	B11	SYBR	RT11	Unkn-08	DMC1		32.6108	33.2077	1.27512					60
	B12	SYBR	RT11	Unkn-08	DMC1		32.4197	33.2077	1.27512					60
	C01	SYBR	RT12	Unkn-09	WT1		25.6044	25.9659	0.494764					60
	C02	SYBR	RT12	Unkn-09	WT1		25.7635	25.9659	0.494764					60
	C03	SYBR	RT12	Unkn-09	WT1		25.5297	25.9659	0.494764					60
	C04	SYBR	RT12	Unkn-10	DMC1		27.2253	27.302	0.127988					60
	C05	SYBR	RT12	Unkn-10	DMC1		27.2309	27.302	0.127988					60
	C06	SYBR	RT12	Unkn-10	DMC1		27.4497	27.302	0.127988					60
	C07	SYBR	Actin	Unkn-11	WT2		26.0757	25.9415	0.342306					60
	C08	SYBR	Actin	Unkn-11	WT2		26.1963	25.9415	0.342306					60
	C09	SYBR	Actin	Unkn-11	WT2		26.1524	25.9415	0.342306					60
	C10	SYBR	Actin	Unkn-12	DMC2		26.353	25.9518	0.436781					60
	C11	SYBR	Actin	Unkn-12	DMC2		26.1865	25.9518	0.436781					60
	C12	SYBR	Actin	Unkn-12	DMC2		26.016	25.9518	0.436781					60
	D01	SYBR	RT9	Unkn-13	WT2		24.4051	24.5641	0.169957					60
	D02	SYBR	RT9	Unkn-13	WT2		24.7432	24.5641	0.169957					60
	D03	SYBR	RT9	Unkn-13	WT2		24.5439	24.5641	0.169957					60
	D04	SYBR	RT9	Unkn-14	DMC2		24.7449	24.8314	0.0831815					60
	D05	SYBR	RT9	Unkn-14	DMC2		24.8386	24.8314	0.0831815					60
	D06	SYBR	RT9	Unkn-14	DMC2		24.9108	24.8314	0.0831815					60
	D07	SYBR	RT10	Unkn-15	WT2		31.7096	31.3772	0.299169					60
	D08	SYBR	RT10	Unkn-15	WT2		31.2925	31.3772	0.299169					60
	D09	SYBR	RT10	Unkn-15	WT2		31.1295	31.3772	0.299169					60
	D10	SYBR	RT10	Unkn-16	DMC2		31.4377	31.0609	0.493316					60
	D11	SYBR	RT10	Unkn-16	DMC2		31.2425	31.0609	0.493316					60
	D12	SYBR	RT10	Unkn-16	DMC2		31.5026	31.0609	0.493316					60
	E01	SYBR	RT11	Unkn-17	WT2		33.8167	33.581	0.343736					60
	E02	SYBR	RT11	Unkn-17	WT2		33.7398	33.581	0.343736					60
	E03	SYBR	RT11	Unkn-17	WT2		33.6866	33.581	0.343736					60
	E04	SYBR	RT11	Unkn-18	DMC2		33.3768	33.3242	0.314002					60
	E05	SYBR	RT11	Unkn-18	DMC2		33.4079	33.3242	0.314002					60
	E06	SYBR	RT11	Unkn-18	DMC2		33.5878	33.3242	0.314002					60
	E07	SYBR	RT12	Unkn-19	WT2		26.0008	26.0164	0.218809					60
	E08	SYBR	RT12	Unkn-19	WT2		25.8058	26.0164	0.218809					60
	E09	SYBR	RT12	Unkn-19	WT2		26.2426	26.0164	0.218809					60
	E10	SYBR	RT12	Unkn-20	DMC2		26.9015	26.448	0.474014					60
	E11	SYBR	RT12	Unkn-20	DMC2		26.6946	26.448	0.474014					60
	E12	SYBR	RT12	Unkn-20	DMC2		26.7478	26.448	0.474014					60
	F01	SYBR	Actin	Unkn-21	WT3		25.4784	25.4256	0.0810281					60
	F02	SYBR	Actin	Unkn-21	WT3		25.4661	25.4256	0.0810281					60
	F03	SYBR	Actin	Unkn-21	WT3		25.3323	25.4256	0.0810281					60
	F04	SYBR	Actin	Unkn-22	DMC3		25.3313	25.4268	0.120651					60
	F05	SYBR	Actin	Unkn-22	DMC3		25.3866	25.4268	0.120651					60
	F06	SYBR	Actin	Unkn-22	DMC3		25.5624	25.4268	0.120651					60
	F07	SYBR	RT9	Unkn-23	WT3		26.451	25.1892	1.17968					60
	F08	SYBR	RT9	Unkn-23	WT3		26.216	25.1892	1.17968					60
	F09	SYBR	RT9	Unkn-23	WT3		26.3006	25.1892	1.17968					60
	F10	SYBR	RT9	Unkn-24	DMC3		24.0343	24.5852	0.908765					60
	F11	SYBR	RT9	Unkn-24	DMC3		24.0408	24.5852	0.908765					60
	F12	SYBR	RT9	Unkn-24	DMC3		24.0806	24.5852	0.908765					60
	G01	SYBR	RT10	Unkn-25	WT3		31.7058	32.0301	0.363837					60
	G02	SYBR	RT10	Unkn-25	WT3		31.961	32.0301	0.363837					60
	G03	SYBR	RT10	Unkn-25	WT3		31.8236	32.0301	0.363837					60
	G04	SYBR	RT10	Unkn-26	DMC3		31.1555	31.5272	0.575143					60
	G05	SYBR	RT10	Unkn-26	DMC3		31.0267	31.5272	0.575143					60
	G06	SYBR	RT10	Unkn-26	DMC3		31.3996	31.5272	0.575143					60
	G07	SYBR	RT11	Unkn-27	WT3		34.3236	33.8178	1.38851					60
	G08	SYBR	RT11	Unkn-27	WT3		34.2684	33.8178	1.38851					60
	G09	SYBR	RT11	Unkn-27	WT3		34.0614	33.8178	1.38851					60
	G10	SYBR	RT11	Unkn-28	DMC3		33.5088	33.3888	0.188423					60
	G11	SYBR	RT11	Unkn-28	DMC3		33.1717	33.3888	0.188423					60
	G12	SYBR	RT11	Unkn-28	DMC3		33.486	33.3888	0.188423					60
	H01	SYBR	RT12	Unkn-29	WT3		26.4581	26.2813	0.257632					60
	H02	SYBR	RT12	Unkn-29	WT3		25.9857	26.2813	0.257632					60
	H03	SYBR	RT12	Unkn-29	WT3		26.4	26.2813	0.257632					60
	H04	SYBR	RT12	Unkn-30	DMC3		24.3339	24.4678	0.123233					60
	H05	SYBR	RT12	Unkn-30	DMC3		24.5764	24.4678	0.123233					60
	H06	SYBR	RT12	Unkn-30	DMC3		24.493	24.4678	0.123233					60

## Sheet: Run Information
File Name	admin_2020-08-19 19-22-35_CT023283.pcrd
Created By User	admin
Notes
ID
Run Started	08/19/2020 11:28:41 UTC
Run Ended	08/19/2020 13:09:51 UTC
Sample Vol	20
Lid Temp	105
Protocol File Name	yingguang.prcl
Plate Setup File Name	PLATE.pltd
Base Serial Number	BR001903
Optical Head Serial Number	788BR01821
CFX Manager Version	3.1.1517.0823.
