# Supplementary material for: Key auxin response factor (ARF) genes constraining wheat tillering of mutant dmc
Source: PeerJ journal article supplement (doi:10.7717/peerj.12221), 2021-09-21
Supplement: Supplementary_files_1.zip [file Plate4---admin_2020-09-09 09-26-39_CT023283 - Quantification Cq Results.xlsx]

Archive with 8 entries (8 files):
- [content_types].xml
- xl/workbook.xml
- xl/sharedstrings.xml
- xl/_rels/workbook.xml.rels
- xl/styles.xml
- xl/worksheets/sheet1.xml
- _rels/.rels
- xl/worksheets/sheet2.xml
