# Supplementary material for: Key auxin response factor (ARF) genes constraining wheat tillering of mutant dmc
Source: PeerJ journal article supplement (doi:10.7717/peerj.12221), 2021-09-21
Supplement: Supplementary_files_1.zip [file Plate4---admin_2020-09-09 09-26-39_CT023283 - Quantification Cq Results.xlsx › xl/_rels/workbook.xml.rels]

<?xml version="1.0"?>
<Relationships xmlns:xsi="http://www.w3.org/2001/XMLSchema-instance" xmlns:xsd="http://www.w3.org/2001/XMLSchema" xmlns="http://schemas.openxmlformats.org/package/2006/relationships">
  <Relationship Target="/xl/worksheets/sheet1.xml" Type="http://schemas.openxmlformats.org/officeDocument/2006/relationships/worksheet" Id="rId1" />
  <Relationship Target="/xl/worksheets/sheet2.xml" Type="http://schemas.openxmlformats.org/officeDocument/2006/relationships/worksheet" Id="rId2" />
  <Relationship Target="/xl/sharedStrings.xml" Type="http://schemas.openxmlformats.org/officeDocument/2006/relationships/sharedStrings" Id="rId4" />
  <Relationship Target="/xl/styles.xml" Type="http://schemas.openxmlformats.org/officeDocument/2006/relationships/styles" Id="rId3" />
</Relationships>
