# Supplementary material for: Key auxin response factor (ARF) genes constraining wheat tillering of mutant dmc
Source: PeerJ journal article supplement (doi:10.7717/peerj.12221), 2021-09-21
Supplement: Supplementary_files_1.zip [file Plate4---admin_2020-09-09 09-26-39_CT023283 - Quantification Cq Results.xlsx › xl/workbook.xml]

<?xml version="1.0"?>
<workbook xmlns:xsi="http://www.w3.org/2001/XMLSchema-instance" xmlns:xsd="http://www.w3.org/2001/XMLSchema" xmlns="http://schemas.openxmlformats.org/spreadsheetml/2006/main">
  <bookViews>
    <workbookView tabRatio="500" />
  </bookViews>
  <sheets>
    <sheet name="0" sheetId="1" d3p1:id="rId1" xmlns:d3p1="http://schemas.openxmlformats.org/officeDocument/2006/relationships" />
    <sheet name="Run Information" sheetId="2" d3p1:id="rId2" xmlns:d3p1="http://schemas.openxmlformats.org/officeDocument/2006/relationships" />
  </sheets>
  <calcPr iterateCount="1" />
</workbook>
