# Supplementary material for: Key auxin response factor (ARF) genes constraining wheat tillering of mutant dmc
Source: PeerJ journal article supplement (doi:10.7717/peerj.12221), 2021-09-21
Supplement: Supplementary_files_1.zip [file Plate4-admin_2020-08-20 09-05-10_CT023283 - Quantification Cq Results.xlsx]

## Sheet: 0
	Well	Fluor	Target	Content	Sample	Biological Set Name	Cq	Cq Mean	Cq Std. Dev	Starting Quantity (SQ)	Log Starting Quantity	SQ Mean	SQ Std. Dev	Set Point	Well Note
	A01	SYBR	Actin	Unkn-01	WT1		26.5255	26.6761	0.170019					60
	A02	SYBR	Actin	Unkn-01	WT1		26.8605	26.6761	0.170019					60
	A03	SYBR	Actin	Unkn-01	WT1		26.6423	26.6761	0.170019					60
	A04	SYBR	Actin	Unkn-02	DMC1		27.2874	27.3189	0.0748534					60
	A05	SYBR	Actin	Unkn-02	DMC1		27.265	27.3189	0.0748534					60
	A06	SYBR	Actin	Unkn-02	DMC1		27.4044	27.3189	0.0748534					60
	A07	SYBR	RT13	Unkn-03	WT1		30.1378	30.2321	0.242865					60
	A08	SYBR	RT13	Unkn-03	WT1		30.5079	30.2321	0.242865					60
	A09	SYBR	RT13	Unkn-03	WT1		30.0505	30.2321	0.242865					60
	A10	SYBR	RT13	Unkn-04	DMC1		30.6954	30.1015	0.862405					60
	A11	SYBR	RT13	Unkn-04	DMC1		30.4968	30.1015	0.862405					60
	A12	SYBR	RT13	Unkn-04	DMC1		30.6123	30.1015	0.862405					60
	B01	SYBR	RT14	Unkn-05	WT1		34.623	34.2916	0.434628					60
	B02	SYBR	RT14	Unkn-05	WT1		34.4524	34.2916	0.434628					60
	B03	SYBR	RT14	Unkn-05	WT1		34.7995	34.2916	0.434628					60
	B04	SYBR	RT14	Unkn-06	DMC1		34.4541	34.3653	0.309182					60
	B05	SYBR	RT14	Unkn-06	DMC1		34.4214	34.3653	0.309182					60
	B06	SYBR	RT14	Unkn-06	DMC1		34.6204	34.3653	0.309182					60
	B07	SYBR	RT15	Unkn-07	WT1		28.4376	28.34	0.228018					60
	B08	SYBR	RT15	Unkn-07	WT1		28.0794	28.34	0.228018					60
	B09	SYBR	RT15	Unkn-07	WT1		28.503	28.34	0.228018					60
	B10	SYBR	RT15	Unkn-08	DMC1		29.2362	29.5357	0.299051					60
	B11	SYBR	RT15	Unkn-08	DMC1		29.5367	29.5357	0.299051					60
	B12	SYBR	RT15	Unkn-08	DMC1		29.8343	29.5357	0.299051					60
	C01	SYBR	RT16	Unkn-09	WT1		28.0825	28.2391	0.179474					60
	C02	SYBR	RT16	Unkn-09	WT1		28.1998	28.2391	0.179474					60
	C03	SYBR	RT16	Unkn-09	WT1		28.435	28.2391	0.179474					60
	C04	SYBR	RT16	Unkn-10	DMC1		29.8195	29.7989	0.196384					60
	C05	SYBR	RT16	Unkn-10	DMC1		29.593	29.7989	0.196384					60
	C06	SYBR	RT16	Unkn-10	DMC1		29.9842	29.7989	0.196384					60
	C07	SYBR	Actin	Unkn-11	WT2		27.2081	27.2901	0.112245					60
	C08	SYBR	Actin	Unkn-11	WT2		27.2441	27.2901	0.112245					60
	C09	SYBR	Actin	Unkn-11	WT2		27.418	27.2901	0.112245					60
	C10	SYBR	Actin	Unkn-12	DMC2		26.2473	26.2407	0.0588676					60
	C11	SYBR	Actin	Unkn-12	DMC2		26.2959	26.2407	0.0588676					60
	C12	SYBR	Actin	Unkn-12	DMC2		26.1787	26.2407	0.0588676					60
	D01	SYBR	RT13	Unkn-13	WT2		31.7929	31.7141	0.162596					60
	D02	SYBR	RT13	Unkn-13	WT2		31.8224	31.7141	0.162596					60
	D03	SYBR	RT13	Unkn-13	WT2		31.5272	31.7141	0.162596					60
	D04	SYBR	RT13	Unkn-14	DMC2		30.4004	30.4149	0.0313532					60
	D05	SYBR	RT13	Unkn-14	DMC2		30.3934	30.4149	0.0313532					60
	D06	SYBR	RT13	Unkn-14	DMC2		30.4508	30.4149	0.0313532					60
	D07	SYBR	RT14	Unkn-15	WT2		35.3718	35.0113	0.88252					60
	D08	SYBR	RT14	Unkn-15	WT2		35.4056	35.0113	0.88252					60
	D09	SYBR	RT14	Unkn-15	WT2		35.6566	35.0113	0.88252					60
	D10	SYBR	RT14	Unkn-16	DMC2		34.1441	33.7688	0.460201					60
	D11	SYBR	RT14	Unkn-16	DMC2		33.9069	33.7688	0.460201					60
	D12	SYBR	RT14	Unkn-16	DMC2		33.9553	33.7688	0.460201					60
	E01	SYBR	RT15	Unkn-17	WT2		27.7486	27.5853	0.184173					60
	E02	SYBR	RT15	Unkn-17	WT2		27.3857	27.5853	0.184173					60
	E03	SYBR	RT15	Unkn-17	WT2		27.6217	27.5853	0.184173					60
	E04	SYBR	RT15	Unkn-18	DMC2		27.4888	27.6906	0.307567					60
	E05	SYBR	RT15	Unkn-18	DMC2		27.6446	27.6906	0.307567					60
	E06	SYBR	RT15	Unkn-18	DMC2		27.5384	27.6906	0.307567					60
	E07	SYBR	RT16	Unkn-19	WT2		28.7528	28.709	0.133514					60
	E08	SYBR	RT16	Unkn-19	WT2		28.5591	28.709	0.133514					60
	E09	SYBR	RT16	Unkn-19	WT2		28.8151	28.709	0.133514					60
	E10	SYBR	RT16	Unkn-20	DMC2		27.7549	28.0216	0.315333					60
	E11	SYBR	RT16	Unkn-20	DMC2		27.9401	28.0216	0.315333					60
	E12	SYBR	RT16	Unkn-20	DMC2		27.8696	28.0216	0.315333					60
	F01	SYBR	Actin	Unkn-21	WT3		26.2918	26.182	0.0954345					60
	F02	SYBR	Actin	Unkn-21	WT3		26.1187	26.182	0.0954345					60
	F03	SYBR	Actin	Unkn-21	WT3		26.1355	26.182	0.0954345					60
	F04	SYBR	Actin	Unkn-22	DMC3		26.4593	26.4046	0.116815					60
	F05	SYBR	Actin	Unkn-22	DMC3		26.2705	26.4046	0.116815					60
	F06	SYBR	Actin	Unkn-22	DMC3		26.4841	26.4046	0.116815					60
	F07	SYBR	RT13	Unkn-23	WT3		30.6479	30.9325	0.249843					60
	F08	SYBR	RT13	Unkn-23	WT3		31.1157	30.9325	0.249843					60
	F09	SYBR	RT13	Unkn-23	WT3		31.0341	30.9325	0.249843					60
	F10	SYBR	RT13	Unkn-24	DMC3		31.2488	30.9011	0.595277					60
	F11	SYBR	RT13	Unkn-24	DMC3		31.2407	30.9011	0.595277					60
	F12	SYBR	RT13	Unkn-24	DMC3		31.2137	30.9011	0.595277					60
	G01	SYBR	RT14	Unkn-25	WT3		33.8821	34.1218	0.306636					60
	G02	SYBR	RT14	Unkn-25	WT3		34.0673	34.1218	0.306636					60
	G03	SYBR	RT14	Unkn-25	WT3		34.016	34.1218	0.306636					60
	G04	SYBR	RT14	Unkn-26	DMC3		34.3417	34.188	0.281605					60
	G05	SYBR	RT14	Unkn-26	DMC3		33.863	34.188	0.281605					60
	G06	SYBR	RT14	Unkn-26	DMC3		34.3594	34.188	0.281605					60
	G07	SYBR	RT15	Unkn-27	WT3		27.3318	27.4873	0.433268					60
	G08	SYBR	RT15	Unkn-27	WT3		27.1533	27.4873	0.433268					60
	G09	SYBR	RT15	Unkn-27	WT3		27.2769	27.4873	0.433268					60
	G10	SYBR	RT15	Unkn-28	DMC3		26.6482	26.9145	0.261656					60
	G11	SYBR	RT15	Unkn-28	DMC3		26.924	26.9145	0.261656					60
	G12	SYBR	RT15	Unkn-28	DMC3		27.1712	26.9145	0.261656					60
	H01	SYBR	RT16	Unkn-29	WT3		29.866	29.7018	0.179578					60
	H02	SYBR	RT16	Unkn-29	WT3		29.7293	29.7018	0.179578					60
	H03	SYBR	RT16	Unkn-29	WT3		29.5101	29.7018	0.179578					60
	H04	SYBR	RT16	Unkn-30	DMC3		27.3682	27.3174	0.0985395					60
	H05	SYBR	RT16	Unkn-30	DMC3		27.2038	27.3174	0.0985395					60
	H06	SYBR	RT16	Unkn-30	DMC3		27.3801	27.3174	0.0985395					60

## Sheet: Run Information
File Name	admin_2020-08-20 09-05-10_CT023283-2.pcrd
Created By User	admin
Notes
ID
Run Started	08/21/2020 08:28:48 UTC
Run Ended	08/21/2020 09:49:16 UTC
Sample Vol	20
Lid Temp	105
Protocol File Name	yingguang.prcl
Plate Setup File Name	PLATE.pltd
Base Serial Number	BR001903
Optical Head Serial Number	788BR01821
CFX Manager Version	3.1.1517.0823.
