# Supplementary material for: Key auxin response factor (ARF) genes constraining wheat tillering of mutant dmc
Source: PeerJ journal article supplement (doi:10.7717/peerj.12221), 2021-09-21
Supplement: Supplementary_files_1.zip [file Plate5---admin_2020-09-09 15-15-06_CT023283 - Quantification Cq Results.xlsx]

## Sheet: 0
	Well	Fluor	Target	Content	Sample	Biological Set Name	Cq	Cq Mean	Cq Std. Dev	Starting Quantity (SQ)	Log Starting Quantity	SQ Mean	SQ Std. Dev	Set Point	Well Note
	A01	SYBR	Actin	Unkn-01	301 0H		25.3134	25.3496	0.174534					60
	A02	SYBR	Actin	Unkn-01	301 0H		25.5393	25.3496	0.174534					60
	A03	SYBR	Actin	Unkn-01	301 0H		25.1959	25.3496	0.174534					60
	A04	SYBR	Actin	Unkn-02	DMC 0H		26.1686	26.6117	0.556621					60
	A05	SYBR	Actin	Unkn-02	DMC 0H		26.43	26.6117	0.556621					60
	A06	SYBR	Actin	Unkn-02	DMC 0H		26.2365	26.6117	0.556621					60
	A07	SYBR	Actin	Unkn-03	301 1H		25.1545	25.0429	0.165968					60
	A08	SYBR	Actin	Unkn-03	301 1H		24.8522	25.0429	0.165968					60
	A09	SYBR	Actin	Unkn-03	301 1H		25.122	25.0429	0.165968					60
	A10	SYBR	Actin	Unkn-04	DMC 1H		24.2132	24.3242	0.221616					60
	A11	SYBR	Actin	Unkn-04	DMC 1H		24.18	24.3242	0.221616					60
	A12	SYBR	Actin	Unkn-04	DMC 1H		24.5793	24.3242	0.221616					60
	B01	SYBR	Actin	Unkn-05	301 2H		22.3997	22.6541	0.231728					60
	B02	SYBR	Actin	Unkn-05	301 2H		22.7095	22.6541	0.231728					60
	B03	SYBR	Actin	Unkn-05	301 2H		22.8531	22.6541	0.231728					60
	B04	SYBR	Actin	Unkn-06	DMC 2H		23.4655	25.6891	3.76588					60
	B05	SYBR	Actin	Unkn-06	DMC 2H		23.5645	25.6891	3.76588					60
	B06	SYBR	Actin	Unkn-06	DMC 2H		23.4371	25.6891	3.76588					60
	B07	SYBR	RT16	Unkn-07	301 0H		32.0086	31.669	0.296701					60
	B08	SYBR	RT16	Unkn-07	301 0H		31.4605	31.669	0.296701					60
	B09	SYBR	RT16	Unkn-07	301 0H		31.5377	31.669	0.296701					60
	B10	SYBR	RT16	Unkn-08	DMC 0H		30.4326	30.554	0.38208					60
	B11	SYBR	RT16	Unkn-08	DMC 0H		30.382	30.554	0.38208					60
	B12	SYBR	RT16	Unkn-08	DMC 0H		30.2474	30.554	0.38208					60
	C01	SYBR	RT16	Unkn-09	301 1H		29.8429	29.9225	0.670618					60
	C02	SYBR	RT16	Unkn-09	301 1H		29.9408	29.9225	0.670618					60
	C03	SYBR	RT16	Unkn-09	301 1H		30.1372	29.9225	0.670618					60
	C04	SYBR	RT16	Unkn-10	DMC 1H		29.2451	30.5493	2.22729					60
	C05	SYBR	RT16	Unkn-10	DMC 1H		29.2816	30.5493	2.22729					60
	C06	SYBR	RT16	Unkn-10	DMC 1H		29.121	30.5493	2.22729					60
	C07	SYBR	RT16	Unkn-11	301 2H		28.2911	28.5088	0.189834					60
	C08	SYBR	RT16	Unkn-11	301 2H		28.595	28.5088	0.189834					60
	C09	SYBR	RT16	Unkn-11	301 2H		28.6402	28.5088	0.189834					60
	C10	SYBR	RT16	Unkn-12	DMC 2H		29.6594	29.796	0.266235					60
	C11	SYBR	RT16	Unkn-12	DMC 2H		29.6259	29.796	0.266235					60
	C12	SYBR	RT16	Unkn-12	DMC 2H		30.1029	29.796	0.266235					60
	D01	SYBR	RT17	Unkn-13	301 0H		29.0576	28.9296	0.228762					60
	D02	SYBR	RT17	Unkn-13	301 0H		28.6655	28.9296	0.228762					60
	D03	SYBR	RT17	Unkn-13	301 0H		29.0658	28.9296	0.228762					60
	D04	SYBR	RT17	Unkn-14	DMC 0H		29.175	28.8627	0.748012					60
	D05	SYBR	RT17	Unkn-14	DMC 0H		29.4039	28.8627	0.748012					60
	D06	SYBR	RT17	Unkn-14	DMC 0H		29.0091	28.8627	0.748012					60
	D07	SYBR	RT17	Unkn-15	301 1H		28.1105	28.1683	0.2994					60
	D08	SYBR	RT17	Unkn-15	301 1H		28.4924	28.1683	0.2994					60
	D09	SYBR	RT17	Unkn-15	301 1H		27.902	28.1683	0.2994					60
	D10	SYBR	RT17	Unkn-16	DMC 1H		27.7879	28.0927	0.320147					60
	D11	SYBR	RT17	Unkn-16	DMC 1H		28.064	28.0927	0.320147					60
	D12	SYBR	RT17	Unkn-16	DMC 1H		28.4262	28.0927	0.320147					60
	E01	SYBR	RT17	Unkn-17	301 2H		26.992	27.1365	0.132969					60
	E02	SYBR	RT17	Unkn-17	301 2H		27.164	27.1365	0.132969					60
	E03	SYBR	RT17	Unkn-17	301 2H		27.2536	27.1365	0.132969					60
	E04	SYBR	RT17	Unkn-18	DMC 2H		27.7477	28.4439	1.01286					60
	E05	SYBR	RT17	Unkn-18	DMC 2H		27.9781	28.4439	1.01286					60
	E06	SYBR	RT17	Unkn-18	DMC 2H		27.6059	28.4439	1.01286					60
	E07	SYBR	RT18	Unkn-19	301 0H		33.1769	33.3529	0.642403					60
	E08	SYBR	RT18	Unkn-19	301 0H		33.065	33.3529	0.642403					60
	E09	SYBR	RT18	Unkn-19	301 0H		32.8169	33.3529	0.642403					60
	E10	SYBR	RT18	Unkn-20	DMC 0H		34.2481	33.7747	0.873151					60
	E11	SYBR	RT18	Unkn-20	DMC 0H		34.309	33.7747	0.873151					60
	E12	SYBR	RT18	Unkn-20	DMC 0H		34.2671	33.7747	0.873151					60
	F01	SYBR	RT18	Unkn-21	301 1H		33.175	32.7433	0.473891					60
	F02	SYBR	RT18	Unkn-21	301 1H		32.8185	32.7433	0.473891					60
	F03	SYBR	RT18	Unkn-21	301 1H		32.9363	32.7433	0.473891					60
	F04	SYBR	RT18	Unkn-22	DMC 1H		31.9028	31.1336	1.83986					60
	F05	SYBR	RT18	Unkn-22	DMC 1H		32.464	31.1336	1.83986					60
	F06	SYBR	RT18	Unkn-22	DMC 1H		32.0339	31.1336	1.83986					60
	F07	SYBR	RT18	Unkn-23	301 2H		33.1842	33.276	0.330542					60
	F08	SYBR	RT18	Unkn-23	301 2H		33.4428	33.276	0.330542					60
	F09	SYBR	RT18	Unkn-23	301 2H		33.0011	33.276	0.330542					60
	F10	SYBR	RT18	Unkn-24	DMC 2H		34.2125	33.9915	0.284932					60
	F11	SYBR	RT18	Unkn-24	DMC 2H		33.6699	33.9915	0.284932					60
	F12	SYBR	RT18	Unkn-24	DMC 2H		34.0921	33.9915	0.284932					60
	G01	SYBR	RT19	Unkn-25	301 0H		29.2719	29.2348	0.0619032					60
	G02	SYBR	RT19	Unkn-25	301 0H		29.2691	29.2348	0.0619032					60
	G03	SYBR	RT19	Unkn-25	301 0H		29.1633	29.2348	0.0619032					60
	G04	SYBR	RT19	Unkn-26	DMC 0H		29.3895	27.3749	3.52452					60
	G05	SYBR	RT19	Unkn-26	DMC 0H		29.4299	27.3749	3.52452					60
	G06	SYBR	RT19	Unkn-26	DMC 0H		29.3052	27.3749	3.52452					60
	G07	SYBR	RT19	Unkn-27	301 1H		27.3899	27.3811	0.246612					60
	G08	SYBR	RT19	Unkn-27	301 1H		27.6232	27.3811	0.246612					60
	G09	SYBR	RT19	Unkn-27	301 1H		27.1302	27.3811	0.246612					60
	G10	SYBR	RT19	Unkn-28	DMC 1H		26.2438	26.4206	0.190802					60
	G11	SYBR	RT19	Unkn-28	DMC 1H		26.6229	26.4206	0.190802					60
	G12	SYBR	RT19	Unkn-28	DMC 1H		26.3951	26.4206	0.190802					60
	H01	SYBR	RT19	Unkn-29	301 2H		25.8834	25.7627	0.145934					60
	H02	SYBR	RT19	Unkn-29	301 2H		25.6005	25.7627	0.145934					60
	H03	SYBR	RT19	Unkn-29	301 2H		25.8042	25.7627	0.145934					60
	H04	SYBR	RT19	Unkn-30	DMC 2H		26.7294	26.3849	0.563688					60
	H05	SYBR	RT19	Unkn-30	DMC 2H		26.6909	26.3849	0.563688					60
	H06	SYBR	RT19	Unkn-30	DMC 2H		26.7344	26.3849	0.563688					60
	H07	SYBR	RT1	Unkn-31	301 0H		30.7686	30.4735	0.454644					60
	H08	SYBR	RT1	Unkn-31	301 0H		30.6013	30.4735	0.454644					60
	H09	SYBR	RT1	Unkn-31	301 0H		30.8505	30.4735	0.454644					60
	H10	SYBR	RT1	Unkn-32	DMC 0H		31.2073	31.0735	0.309976					60
	H11	SYBR	RT1	Unkn-32	DMC 0H		31.2941	31.0735	0.309976					60
	H12	SYBR	RT1	Unkn-32	DMC 0H		31.7191	31.0735	0.309976					60

## Sheet: Run Information
File Name	admin_2020-09-09 15-15-06_CT023283.pcrd
Created By User	admin
Notes
ID
Run Started	09/09/2020 07:15:29 UTC
Run Ended	09/09/2020 08:37:01 UTC
Sample Vol	20
Lid Temp	105
Protocol File Name	yingguang.prcl
Plate Setup File Name	PLATE5.pltd
Base Serial Number	BR001903
Optical Head Serial Number	788BR01821
CFX Manager Version	3.1.1517.0823.
