# Supplementary material for: Key auxin response factor (ARF) genes constraining wheat tillering of mutant dmc
Source: PeerJ journal article supplement (doi:10.7717/peerj.12221), 2021-09-21
Supplement: Supplementary_files_1.zip [file Plate5-admin_2020-08-20 10-29-03_CT023283 - Quantification Cq Results.xlsx]

## Sheet: 0
	Well	Fluor	Target	Content	Sample	Biological Set Name	Cq	Cq Mean	Cq Std. Dev	Starting Quantity (SQ)	Log Starting Quantity	SQ Mean	SQ Std. Dev	Set Point	Well Note
	A01	SYBR	Actin	Unkn-01	WT1		25.4782	25.7133	0.203622					60
	A02	SYBR	Actin	Unkn-01	WT1		25.8318	25.7133	0.203622					60
	A03	SYBR	Actin	Unkn-01	WT1		25.83	25.7133	0.203622					60
	A04	SYBR	Actin	Unkn-02	DMC1		26.561	26.7062	0.13677					60
	A05	SYBR	Actin	Unkn-02	DMC1		26.8326	26.7062	0.13677					60
	A06	SYBR	Actin	Unkn-02	DMC1		26.725	26.7062	0.13677					60
	A07	SYBR	RT17	Unkn-03	WT1		26.5996	26.6141	0.0203929					60
	A08	SYBR	RT17	Unkn-03	WT1		26.6053	26.6141	0.0203929					60
	A09	SYBR	RT17	Unkn-03	WT1		26.6374	26.6141	0.0203929					60
	A10	SYBR	RT17	Unkn-04	DMC1		26.8099	27.0182	0.232759					60
	A11	SYBR	RT17	Unkn-04	DMC1		27.2695	27.0182	0.232759					60
	A12	SYBR	RT17	Unkn-04	DMC1		26.9753	27.0182	0.232759					60
	B01	SYBR	RT18	Unkn-05	WT1		31.3422	31.4319	0.166304					60
	B02	SYBR	RT18	Unkn-05	WT1		31.3297	31.4319	0.166304					60
	B03	SYBR	RT18	Unkn-05	WT1		31.6238	31.4319	0.166304					60
	B04	SYBR	RT18	Unkn-06	DMC1		32.7447	32.2819	0.768463					60
	B05	SYBR	RT18	Unkn-06	DMC1		32.7948	32.2819	0.768463					60
	B06	SYBR	RT18	Unkn-06	DMC1		32.7061	32.2819	0.768463					60
	B07	SYBR	RT19	Unkn-07	WT1		27.3919	27.5669	0.153973					60
	B08	SYBR	RT19	Unkn-07	WT1		27.6271	27.5669	0.153973					60
	B09	SYBR	RT19	Unkn-07	WT1		27.6817	27.5669	0.153973					60
	B10	SYBR	RT19	Unkn-08	DMC1		28.6203	28.4041	0.58164					60
	B11	SYBR	RT19	Unkn-08	DMC1		28.8467	28.4041	0.58164					60
	B12	SYBR	RT19	Unkn-08	DMC1		28.7453	28.4041	0.58164					60
	C01	SYBR	RT20	Unkn-09	WT1		29.2921	29.6217	0.659088					60
	C02	SYBR	RT20	Unkn-09	WT1		29.1924	29.6217	0.659088					60
	C03	SYBR	RT20	Unkn-09	WT1		29.3806	29.6217	0.659088					60
	C04	SYBR	RT20	Unkn-10	DMC1		28.9258	29.2018	0.246597					60
	C05	SYBR	RT20	Unkn-10	DMC1		29.4004	29.2018	0.246597					60
	C06	SYBR	RT20	Unkn-10	DMC1		29.2793	29.2018	0.246597					60
	C07	SYBR	Actin	Unkn-11	WT2		26.5915	26.5981	0.131413					60
	C08	SYBR	Actin	Unkn-11	WT2		26.4702	26.5981	0.131413					60
	C09	SYBR	Actin	Unkn-11	WT2		26.7327	26.5981	0.131413					60
	C10	SYBR	Actin	Unkn-12	DMC2		25.3794	25.4077	0.114396					60
	C11	SYBR	Actin	Unkn-12	DMC2		25.5336	25.4077	0.114396					60
	C12	SYBR	Actin	Unkn-12	DMC2		25.3101	25.4077	0.114396					60
	D01	SYBR	RT17	Unkn-13	WT2		26.6407	26.6643	0.0327652					60
	D02	SYBR	RT17	Unkn-13	WT2		26.7017	26.6643	0.0327652					60
	D03	SYBR	RT17	Unkn-13	WT2		26.6505	26.6643	0.0327652					60
	D04	SYBR	RT17	Unkn-14	DMC2		25.9106	25.9822	0.0632724					60
	D05	SYBR	RT17	Unkn-14	DMC2		26.0305	25.9822	0.0632724					60
	D06	SYBR	RT17	Unkn-14	DMC2		26.0055	25.9822	0.0632724					60
	D07	SYBR	RT18	Unkn-15	WT2		33.0363	32.6811	0.44652					60
	D08	SYBR	RT18	Unkn-15	WT2		32.8798	32.6811	0.44652					60
	D09	SYBR	RT18	Unkn-15	WT2		32.8272	32.6811	0.44652					60
	D10	SYBR	RT18	Unkn-16	DMC2		30.8832	30.9466	0.356401					60
	D11	SYBR	RT18	Unkn-16	DMC2		30.7304	30.9466	0.356401					60
	D12	SYBR	RT18	Unkn-16	DMC2		30.6261	30.9466	0.356401					60
	E01	SYBR	RT19	Unkn-17	WT2		27.2568	27.1657	0.111093					60
	E02	SYBR	RT19	Unkn-17	WT2		27.042	27.1657	0.111093					60
	E03	SYBR	RT19	Unkn-17	WT2		27.1984	27.1657	0.111093					60
	E04	SYBR	RT19	Unkn-18	DMC2		26.7173	26.7421	0.108968					60
	E05	SYBR	RT19	Unkn-18	DMC2		26.8613	26.7421	0.108968					60
	E06	SYBR	RT19	Unkn-18	DMC2		26.6477	26.7421	0.108968					60
	E07	SYBR	RT20	Unkn-19	WT2		28.3234	28.5971	0.242695					60
	E08	SYBR	RT20	Unkn-19	WT2		28.6819	28.5971	0.242695					60
	E09	SYBR	RT20	Unkn-19	WT2		28.786	28.5971	0.242695					60
	E10	SYBR	RT20	Unkn-20	DMC2		28.4313	28.2709	0.154002					60
	E11	SYBR	RT20	Unkn-20	DMC2		28.2572	28.2709	0.154002					60
	E12	SYBR	RT20	Unkn-20	DMC2		28.1243	28.2709	0.154002					60
	F01	SYBR	Actin	Unkn-21	WT3		25.5343	25.4016	0.118576					60
	F02	SYBR	Actin	Unkn-21	WT3		25.3644	25.4016	0.118576					60
	F03	SYBR	Actin	Unkn-21	WT3		25.306	25.4016	0.118576					60
	F04	SYBR	Actin	Unkn-22	DMC3		25.6299	25.7785	0.15839					60
	F05	SYBR	Actin	Unkn-22	DMC3		25.7603	25.7785	0.15839					60
	F06	SYBR	Actin	Unkn-22	DMC3		25.9451	25.7785	0.15839					60
	F07	SYBR	RT17	Unkn-23	WT3		26.1405	26.2827	0.12787					60
	F08	SYBR	RT17	Unkn-23	WT3		26.3881	26.2827	0.12787					60
	F09	SYBR	RT17	Unkn-23	WT3		26.3195	26.2827	0.12787					60
	F10	SYBR	RT17	Unkn-24	DMC3		25.4542	25.7229	0.256018					60
	F11	SYBR	RT17	Unkn-24	DMC3		25.7505	25.7229	0.256018					60
	F12	SYBR	RT17	Unkn-24	DMC3		25.964	25.7229	0.256018					60
	G01	SYBR	RT18	Unkn-25	WT3		31.7624	31.8013	0.501803					60
	G02	SYBR	RT18	Unkn-25	WT3		31.5214	31.8013	0.501803					60
	G03	SYBR	RT18	Unkn-25	WT3		31.32	31.8013	0.501803					60
	G04	SYBR	RT18	Unkn-26	DMC3		31.0326	31.5314	0.527011					60
	G05	SYBR	RT18	Unkn-26	DMC3		31.4788	31.5314	0.527011					60
	G06	SYBR	RT18	Unkn-26	DMC3		31.2827	31.5314	0.527011					60
	G07	SYBR	RT19	Unkn-27	WT3		27.768	27.6697	0.126384					60
	G08	SYBR	RT19	Unkn-27	WT3		27.7138	27.6697	0.126384					60
	G09	SYBR	RT19	Unkn-27	WT3		27.5271	27.6697	0.126384					60
	G10	SYBR	RT19	Unkn-28	DMC3		26.3686	26.5951	0.218519					60
	G11	SYBR	RT19	Unkn-28	DMC3		26.612	26.5951	0.218519					60
	G12	SYBR	RT19	Unkn-28	DMC3		26.8046	26.5951	0.218519					60
	H01	SYBR	RT20	Unkn-29	WT3		28.0506	27.8708	0.160239					60
	H02	SYBR	RT20	Unkn-29	WT3		27.8188	27.8708	0.160239					60
	H03	SYBR	RT20	Unkn-29	WT3		27.743	27.8708	0.160239					60
	H04	SYBR	RT20	Unkn-30	DMC3		27.9812	27.9353	0.13656					60
	H05	SYBR	RT20	Unkn-30	DMC3		28.0429	27.9353	0.13656					60
	H06	SYBR	RT20	Unkn-30	DMC3		27.7817	27.9353	0.13656					60

## Sheet: Run Information
File Name	admin_2020-08-20 10-29-03_CT023283-2.pcrd
Created By User	admin
Notes
ID
Run Started	08/21/2020 09:55:51 UTC
Run Ended	08/21/2020 11:16:34 UTC
Sample Vol	20
Lid Temp	105
Protocol File Name	yingguang.prcl
Plate Setup File Name	PLATE.pltd
Base Serial Number	BR001903
Optical Head Serial Number	788BR01821
CFX Manager Version	3.1.1517.0823.
