# Supplementary material for: Key auxin response factor (ARF) genes constraining wheat tillering of mutant dmc
Source: PeerJ journal article supplement (doi:10.7717/peerj.12221), 2021-09-21
Supplement: Supplementary_files_1.zip [file Plate6---admin_2020-09-09 19--27-49_CT023283 - Quantification Cq Results.xlsx]

## Sheet: 0
	Well	Fluor	Target	Content	Sample	Biological Set Name	Cq	Cq Mean	Cq Std. Dev	Starting Quantity (SQ)	Log Starting Quantity	SQ Mean	SQ Std. Dev	Set Point	Well Note
	A01	SYBR	Actin	Unkn-01	301 0H		25.331	25.0925	0.215283					60
	A02	SYBR	Actin	Unkn-01	301 0H		25.0341	25.0925	0.215283					60
	A03	SYBR	Actin	Unkn-01	301 0H		24.9125	25.0925	0.215283					60
	A04	SYBR	Actin	Unkn-02	DMC 0H		25.3955	25.7093	0.29826					60
	A05	SYBR	Actin	Unkn-02	DMC 0H		25.9891	25.7093	0.29826					60
	A06	SYBR	Actin	Unkn-02	DMC 0H		25.7433	25.7093	0.29826					60
	A07	SYBR	Actin	Unkn-03	301 1H		24.2585	24.1699	0.10313					60
	A08	SYBR	Actin	Unkn-03	301 1H		24.0567	24.1699	0.10313					60
	A09	SYBR	Actin	Unkn-03	301 1H		24.1947	24.1699	0.10313					60
	A10	SYBR	Actin	Unkn-04	DMC 1H		23.3354	23.6994	0.458384					60
	A11	SYBR	Actin	Unkn-04	DMC 1H		23.2142	23.6994	0.458384					60
	A12	SYBR	Actin	Unkn-04	DMC 1H		23.5486	23.6994	0.458384					60
	B01	SYBR	Actin	Unkn-05	301 2H		22.4297	22.2165	0.200582					60
	B02	SYBR	Actin	Unkn-05	301 2H		22.0314	22.2165	0.200582					60
	B03	SYBR	Actin	Unkn-05	301 2H		22.1885	22.2165	0.200582					60
	B04	SYBR	Actin	Unkn-06	DMC 2H		22.9465	23.1017	0.149368					60
	B05	SYBR	Actin	Unkn-06	DMC 2H		23.2444	23.1017	0.149368					60
	B06	SYBR	Actin	Unkn-06	DMC 2H		23.1142	23.1017	0.149368					60
	B07	SYBR	RT20	Unkn-07	301 0H		26.114	26.1727	0.056479					60
	B08	SYBR	RT20	Unkn-07	301 0H		26.2267	26.1727	0.056479					60
	B09	SYBR	RT20	Unkn-07	301 0H		26.1774	26.1727	0.056479					60
	B10	SYBR	RT20	Unkn-08	DMC 0H		25.8455	25.7674	0.0688911					60
	B11	SYBR	RT20	Unkn-08	DMC 0H		25.7152	25.7674	0.0688911					60
	B12	SYBR	RT20	Unkn-08	DMC 0H		25.7416	25.7674	0.0688911					60
	C01	SYBR	RT20	Unkn-09	301 1H		26.0717	26.1238	0.157487					60
	C02	SYBR	RT20	Unkn-09	301 1H		25.9989	26.1238	0.157487					60
	C03	SYBR	RT20	Unkn-09	301 1H		26.3007	26.1238	0.157487					60
	C04	SYBR	RT20	Unkn-10	DMC 1H		24.8685	24.9271	0.0897027					60
	C05	SYBR	RT20	Unkn-10	DMC 1H		25.0304	24.9271	0.0897027					60
	C06	SYBR	RT20	Unkn-10	DMC 1H		24.8824	24.9271	0.0897027					60
	C07	SYBR	RT20	Unkn-11	301 2H		24.221	24.2078	0.0431018					60
	C08	SYBR	RT20	Unkn-11	301 2H		24.1597	24.2078	0.0431018					60
	C09	SYBR	RT20	Unkn-11	301 2H		24.2428	24.2078	0.0431018					60
	C10	SYBR	RT20	Unkn-12	DMC 2H		25.308	25.1992	0.325941					60
	C11	SYBR	RT20	Unkn-12	DMC 2H		25.1383	25.1992	0.325941					60
	C12	SYBR	RT20	Unkn-12	DMC 2H		25.5513	25.1992	0.325941					60
	D01	SYBR	RT1	Unkn-13	301 0H		30.2757	29.4386	1.00801					60
	D02	SYBR	RT1	Unkn-13	301 0H		29.9787	29.4386	1.00801					60
	D03	SYBR	RT1	Unkn-13	301 0H		30.0615	29.4386	1.00801					60
	D04	SYBR	RT1	Unkn-14	DMC 0H		31.0926	31.1615	0.147341					60
	D05	SYBR	RT1	Unkn-14	DMC 0H		31.3306	31.1615	0.147341					60
	D06	SYBR	RT1	Unkn-14	DMC 0H		31.0612	31.1615	0.147341					60

## Sheet: Run Information
File Name	admin_2020-09-09 19-27-49_CT023283.pcrd
Created By User	admin
Notes
ID
Run Started	09/09/2020 11:28:21 UTC
Run Ended	09/09/2020 12:49:26 UTC
Sample Vol	20
Lid Temp	105
Protocol File Name	yingguang.prcl
Plate Setup File Name	PLATE6.pltd
Base Serial Number	BR001903
Optical Head Serial Number	788BR01821
CFX Manager Version	3.1.1517.0823.
